# Supplementary material for: One-pot four-component approach for the construction of dihydropyridines and dihydropyridinones using amines and activated alkynes
Source: Royal Society of Chemistry journal article supplement (doi:10.1039/c3ra45850d), 2013-12-18

# One pot four component approach for the construction of dihydropyridines and dihydropyridinones using amines and activated alkynes

Selvarangam.E.Kiruthika and Paramasivan.T.Perumal

Organic Chemistry Division, Central Leather Research Institute, Adyar, Chennai 600 020

## Supplementary data

| Contents                                               | Page No. |
|--------------------------------------------------------|----------|
| 1. Typical procedure and Spectral data from vompounds  | 3        |
| 2. <sup>1</sup> H NMR spectrum of compound <b>5a</b>   | 10       |
| 3. <sup>13</sup> C NMR spectrum of compound <b>5a</b>  | 10       |
| 4. <sup>1</sup> H NMR spectrum of compound <b>5b</b>   | 11       |
| 5. <sup>13</sup> C NMR spectrum of compound <b>5b</b>  | 11       |
| 6. <sup>1</sup> H NMR spectrum of compound <b>5c</b>   | 12       |
| 7. <sup>13</sup> C NMR spectrum of compound <b>5c</b>  | 12       |
| 8. <sup>1</sup> H NMR spectrum of compound <b>5d</b>   | 13       |
| 9. <sup>13</sup> C NMR spectrum of compound <b>5d</b>  | 13       |
| 10. <sup>1</sup> H NMR spectrum of compound <b>5e</b>  | 14       |
| 11. <sup>13</sup> C NMR spectrum of compound <b>5e</b> | 14       |
| 12. <sup>1</sup> H NMR spectrum of compound <b>5f</b>  | 15       |
| 13. <sup>13</sup> C NMR spectrum of compound <b>5f</b> | 15       |
| 14. <sup>1</sup> H NMR spectrum of compound <b>5g</b>  | 16       |
| 15. <sup>13</sup> C NMR spectrum of compound <b>5g</b> | 16       |
| 16. <sup>1</sup> H NMR spectrum of compound <b>5h</b>  | 17       |
| 17. <sup>13</sup> C NMR spectrum of compound <b>5h</b> | 17       |
| 18. <sup>1</sup> H NMR spectrum of compound <b>5i</b>  | 18       |
| 19. <sup>13</sup> C NMR spectrum of compound <b>5i</b> | 18       |
| 20. <sup>1</sup> H NMR spectrum of compound <b>5j</b>  | 19       |
| 21. <sup>13</sup> C NMR spectrum of compound <b>5j</b> | 19       |
| 22. <sup>1</sup> H NMR spectrum of compound <b>5k</b>  | 20       |
| 23. <sup>13</sup> C NMR spectrum of compound <b>5k</b> | 20       |

|                                                         |    |
|---------------------------------------------------------|----|
| 24. <sup>1</sup> H NMR spectrum of compound <b>5l</b>   | 21 |
| 25. <sup>13</sup> C NMR spectrum of compound <b>5l</b>  | 21 |
| 26. <sup>1</sup> H NMR spectrum of compound <b>5m</b>   | 22 |
| 27. <sup>13</sup> C NMR spectrum of compound <b>5m</b>  | 22 |
| 28. <sup>1</sup> H NMR spectrum of compound <b>5n</b>   | 23 |
| 29. <sup>13</sup> C NMR spectrum of compound <b>5n</b>  | 23 |
| 30. <sup>1</sup> H NMR spectrum of compound <b>5o</b>   | 24 |
| 31. <sup>13</sup> C NMR spectrum of compound <b>5o</b>  | 24 |
| 32. <sup>1</sup> H NMR spectrum of compound <b>13a</b>  | 25 |
| 33. <sup>13</sup> C NMR spectrum of compound <b>13a</b> | 25 |
| 34. <sup>1</sup> H NMR spectrum of compound <b>13b</b>  | 26 |
| 35. <sup>13</sup> C NMR spectrum of compound <b>13b</b> | 26 |
| 36. <sup>1</sup> H NMR spectrum of compound <b>13c</b>  | 27 |
| 37. <sup>13</sup> C NMR spectrum of compound <b>13c</b> | 27 |
| 38. <sup>1</sup> H NMR spectrum of compound <b>13d</b>  | 28 |
| 39. <sup>13</sup> C NMR spectrum of compound <b>13d</b> | 28 |
| 40. <sup>1</sup> H NMR spectrum of compound <b>13e</b>  | 29 |
| 41. <sup>13</sup> C NMR spectrum of compound <b>13e</b> | 29 |
| 42. <sup>1</sup> H NMR spectrum of compound <b>13f</b>  | 30 |
| 43. <sup>13</sup> C NMR spectrum of compound <b>13f</b> | 30 |
| 44. HSQC spectrum of <b>5a</b>                          | 31 |
| 45. HMBC spectrum of <b>5a</b>                          | 31 |
| 46. UV absorption spectrum of <b>5a</b>                 | 32 |
| 47. Emission Spectrum of <b>5a</b>                      | 32 |
| 48. UV absorption Spectrum of <b>13a</b>                | 33 |
| 49. Emission spectrum of <b>13a</b>                     | 33 |
| 50. Correlation Data figure for compound <b>5a</b>      | 34 |

### Typical procedure for the synthesis of dihydropyridines (5a-o)

To a mixture of 2-hydroxy aldehyde **1** (1 mmol), malononitrile **2a** (1 mmol), aromatic amine **3** (1 mmol) and L-Proline (10 mol %) was syringed out alkyne **4** (1 mmol). The reaction mixture was stirred vigorously at room temperature till the completion of the reaction as monitored by TLC. The product was isolated by flash chromatographic purification using 2:3 EtOAc/Hexane.

### Spectral data for the synthesized compounds

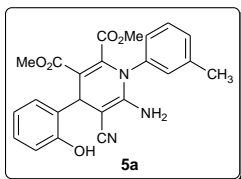

**Dimethyl 6-amino-5-cyano-1,4-dihydro-4-(2-hydroxyphenyl)-1-m-tolylpyridine-2,3-dicarboxylate (5a).** White solid. Yield: 84%.  $R_f$ : 0.25 (2:3 EtOAc/Hexane). mp: 190-192°C. IR (KBr): 3480, 3319, 2962, 2199, 1759, 1730, 1430, 1289, 1118, 729, 523  $\text{cm}^{-1}$ .  $^1\text{H}$  NMR (400 MHz, DMSO- $d_6$ / TMS):  $\delta$  = 2.34 (s, 3H), 3.34 (s, 3H), 3.48 (s, 3H), 4.75 (s, 1H), 5.36 (s, 2H, -NH<sub>2</sub>), 6.80 (t,  $J$  = 8.6 Hz, 2H), 7.04-7.12 (m, 4H), 7.30 (d,  $J$  = 7.5 Hz, 1H), 7.37 (t,  $J$  = 7.5 Hz, 1H), 9.61 (s, 1H, -OH).  $^{13}\text{C}$  NMR (100 MHz, DMSO- $d_6$ /TMS):  $\delta$  = 20.8, 33.6, 51.8, 52.3, 59.2, 103.4, 115.7, 119.1, 121.4, 127.2, 127.9, 128.5, 129.3, 130.5, 130.7, 131.1, 135.7, 139.2, 142.6, 151.3, 155.1, 163.4, 165.5. Elemental Analyses for C<sub>23</sub>H<sub>21</sub>N<sub>3</sub>O<sub>5</sub>, Calc: C, 65.86; H, 5.05; N, 10.02. Found: C, 65.88; H, 5.04; N, 10.01. MS (ESI):  $m/z$  420.5 [M+H]<sup>+</sup>.

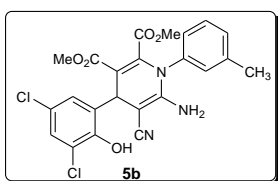

**Dimethyl 6-amino-4-(3,5-dichloro-2-hydroxyphenyl)-5-cyano-1,4-dihydro-1-m-tolylpyridine-2,3-dicarboxylate (5b)** White solid. Yield: 80%.  $R_f$ : 0.25 (2:3 EtOAc/Hexane). mp: 187-189°C. IR (KBr): 3452, 3323, 2955, 2186, 1744, 1726, 1454, 1440, 1247, 1122, 703, 626  $\text{cm}^{-1}$ .  $^1\text{H}$  NMR (500 MHz, DMSO- $d_6$ / TMS):  $\delta$  = 2.34 (s, 3H), 3.30 (s, 3H), 3.74 (s, 3H), 4.88 (s, 1H), 5.56 (s, 2H, -NH<sub>2</sub>), 7.08-7.12 (m, 3H), 7.32 (d,  $J$  = 7.5 Hz, 1H), 7.37-7.42 (m, 2H), 9.50 (s, 1H, -OH).  $^{13}\text{C}$  NMR (125 MHz, DMSO- $d_6$ /TMS):  $\delta$  = 20.8, 32.3, 51.0, 53.2, 58.0, 102.6, 107.5, 113.9, 120.8, 121.8, 123.0, 126.9, 127.1, 127.5, 129.3, 130.6, 135.2, 135.6, 139.2, 143.0, 151.6, 163.0, 165.0. Elemental Analyses for C<sub>23</sub>H<sub>19</sub>Cl<sub>2</sub>N<sub>3</sub>O<sub>5</sub> Calc: C, 56.57; H, 3.92; N, 8.61. Found: C, 56.60; H, 3.90; N, 8.60. MS (ESI):  $m/z$  488.4 [M+H]<sup>+</sup>.

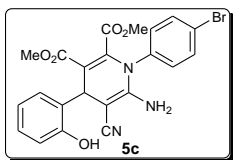

**Dimethyl 6-amino-1-(4-bromophenyl)-5-cyano-1,4-dihydro-4-(2-hydroxyphenyl)pyridine-2,3-dicarboxylate (5c).** White solid. Yield: 79%.  $R_f$ : 0.25 (2:3 EtOAc/Hexane). mp: 194-196°C. IR (KBr): 3461, 3350, 2950, 2181, 1744, 1707, 1648, 1569, 1412, 1353, 1228, 1118, 1012, 759, 722, 528  $\text{cm}^{-1}$ .  $^1\text{H}$  NMR (500 MHz, DMSO- $d_6$ / TMS):  $\delta$  = 3.38 (s, 3H), 3.48 (s, 3H), 4.73 (s, 1H), 5.53 (s, 2H, -NH<sub>2</sub>), 6.76-6.80 (m, 2H), 7.05-7.08 (m, 2H), 7.23 (d,  $J$  = 8.5 Hz, 2H), 7.69 (d,  $J$  = 8.5 Hz, 2H), 9.60 (s, 1H, -OH).  $^{13}\text{C}$  NMR (125 MHz, DMSO- $d_6$ /TMS):  $\delta$  = 33.8, 51.8, 52.4, 59.2, 103.6, 115.7, 119.0, 121.2, 123.2, 127.9, 128.5, 130.9, 132.5, 132.6, 135.2, 142.2, 151.2, 155.1, 163.3, 165.4. Elemental Analyses for C<sub>22</sub>H<sub>18</sub>BrN<sub>3</sub>O<sub>5</sub> Calc: C, 54.56; H, 3.75; N, 8.68. Found: C, 54.58; H, 3.74; N, 8.67. MS (ESI):  $m/z$  484.7[M+H]<sup>+</sup>.

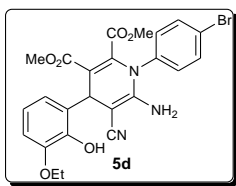

**Dimethyl 6-amino-1-(4-bromophenyl)-5-cyano-4-(3-ethoxy-2-hydroxyphenyl)-1,4-dihydropyridine-2,3-dicarboxylate (5d).** White solid. Yield: 77%.  $R_f$ : 0.25 (2:3 EtOAc/Hexane). mp: 180-182°C. IR (KBr): 3489, 3397, 2962, 2156, 1750, 1723, 1689, 1577, 1465, 1333, 1298, 1110, 1023, 789, 603  $\text{cm}^{-1}$ .  $^1\text{H}$  NMR (500 MHz, DMSO- $d_6$ /TMS):  $\delta$  = 1.39 (t,  $J$  = 7 Hz, 3H), 3.36 (s, 3H), 3.47 (s, 3H), 4.04 (q,  $J$  = 7 Hz, 2H), 4.74 (s, 1H), 5.46 (s, 2H, -NH $_2$ ), 6.69-6.73 (m, 2H), 6.79-6.81 (m, 1H), 7.31 (d,  $J$  = 8.5 Hz, 2H), 7.67 (d,  $J$  = 8.5 Hz, 2H), 8.48 (s, 1H, -OH).  $^{13}\text{C}$  NMR (125 MHz, DMSO- $d_6$ /TMS):  $\delta$  = 14.7, 34.0, 51.7, 52.3, 58.9, 63.9, 103.4, 111.0, 118.5, 120.5, 121.2, 123.2, 131.0, 132.4, 132.7, 135.1, 142.0, 144.3, 146.6, 151.1, 163.2, 165.4. Elemental Analyses for  $\text{C}_{24}\text{H}_{22}\text{BrN}_3\text{O}_6$  Calc: C, 54.56; H, 4.20; N, 7.95. Found: C, 54.58; H, 4.19; N, 7.94. MS (ESI):  $m/z$  528.2[M+H] $^+$ .

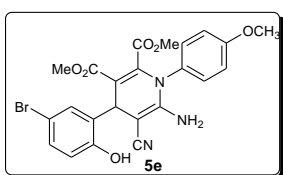

**Dimethyl 6-amino-4-(5-bromo-2-hydroxyphenyl)-5-cyano-1,4-dihydro-1-(4-methoxyphenyl)pyridine-2,3-dicarboxylate (5e).** White solid. Yield: 82%.  $R_f$ : 0.25 (2:3 EtOAc/Hexane). mp: 196-198°C. IR (KBr): 3487, 3369, 2982, 2156, 1754, 1710, 1621, 1522, 1423, 1300, 1298, 1150, 1069, 700, 689  $\text{cm}^{-1}$ .  $^1\text{H}$  NMR (500 MHz, DMSO- $d_6$ /TMS):  $\delta$  = 3.37 (s, 3H), 3.50 (s, 3H), 3.79 (s, 3H), 4.71 (s, 1H), 5.45 (s, 2H, -NH $_2$ ), 6.79 (d,  $J$  = 7.5 Hz, 1H), 7.03 (d,  $J$  = 8.5 Hz, 2H), 7.18-7.23 (m, 4H), 9.98 (s, 1H, -OH).  $^{13}\text{C}$  NMR (125 MHz, DMSO- $d_6$ /TMS):  $\delta$  = 33.8, 51.8, 52.3, 55.5, 58.2, 102.4, 109.9, 114.7, 117.9, 121.1, 127.8, 130.4, 130.8, 131.3, 133.6, 143.2, 151.8, 154.5, 159.9, 163.1, 165.2. Elemental Analyses for  $\text{C}_{23}\text{H}_{20}\text{BrN}_3\text{O}_6$  Calc: C, 53.71; H, 3.92; N, 8.17. Found: C, 53.69; H, 3.93; N, 8.18. MS (ESI):  $m/z$  514.6 [M+H] $^+$ .

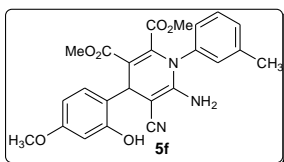

**Dimethyl 6-amino-5-cyano-1,4-dihydro-4-(2-hydroxy-4-methoxyphenyl)-1-*m*-tolylpyridine-2,3-dicarboxylate (5f).** White solid, Yield: 83%.  $R_f$ : 0.25 (2:3 EtOAc/Hexane). mp: 185-187°C. IR (KBr): 3452, 3321, 2920, 2177, 1752, 1736, 1655, 1566, 1499, 1326, 1256, 1122, 1000, 780, 600  $\text{cm}^{-1}$ .  $^1\text{H}$  NMR (500 MHz, DMSO- $d_6$ /TMS):  $\delta$  = 2.34 (s, 3H), 3.33 (s, 3H), 3.48 (s, 3H), 3.68 (s, 3H), 4.66 (s, 1H), 5.29 (s, 2H, -NH $_2$ ), 6.37-6.40 (m, 2H), 6.99 (d,  $J$  = 8.5 Hz, 1H), 7.07-7.11 (m, 2H), 7.29 (d,  $J$  = 7.5 Hz, 1H), 7.35 (t,  $J$  = 8 Hz, 1H), 9.61 (s, 1H, -OH).  $^{13}\text{C}$  NMR (125 MHz, DMSO- $d_6$ /TMS):  $\delta$  = 20.7, 33.0, 51.7, 52.1, 54.9, 59.6, 101.5, 103.5, 104.3, 121.3, 123.9, 127.1, 129.1, 129.2, 130.4, 130.6, 135.7, 139.1, 142.2, 151.0, 155.9, 159.0, 163.3, 165.5. Elemental Analyses for  $\text{C}_{24}\text{H}_{23}\text{N}_3\text{O}_6$  Calc: C, 64.13; H, 5.16; N, 9.35. Found: C, 64.10; H, 5.18; N, 9.36. MS (ESI):  $m/z$  450.2[M+H] $^+$ .

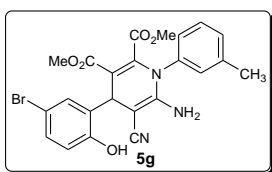

**Dimethyl 6-amino-4-(5-bromo-2-hydroxyphenyl)-5-cyano-1,4-dihydro-1-*m*-tolylpyridine-2,3-dicarboxylate (5g).** White solid. Yield: 78%.  $R_f$ : 0.25 (2:3 EtOAc/Hexane). mp: 195-197°C. IR (KBr): 3444, 3354, 2945, 2192, 1736, 1725, 1645, 1582, 1423, 1326, 1262, 1178, 1022, 783, 700, 623  $\text{cm}^{-1}$ .  $^1\text{H}$  NMR (400 MHz,  $\text{CDCl}_3$ /TMS):

$\delta = 2.32$  (s, 3H), 3.34 (s, 3H), 3.48 (s, 3H), 4.70 (s, 1H), 5.42 (s, 2H, -NH<sub>2</sub>), 6.80 (d,  $J = 8.4$  Hz, 1H), 7.04-7.06 (m, 2H), 7.19-7.23 (m, 2H), 7.29 (d,  $J = 7.6$  Hz, 1H), 7.36 (t,  $J = 8$  Hz, 1H), 10.16 (s, 1H, -OH). <sup>13</sup>C NMR (100 MHz, DMSO-d<sub>6</sub>/TMS):  $\delta$  21.2, 34.1, 52.3, 52.8, 58.8, 103.4, 110.4, 118.3, 121.5, 127.3, 129.8, 130.7, 130.9, 131.1, 133.8, 135.8, 139.9, 143.3, 152.1, 154.9, 163.6, 165.6. Elemental Analyses for C<sub>23</sub>H<sub>20</sub>BrN<sub>3</sub>O<sub>5</sub> Calc: C, 55.43; H, 4.05; N, 8.43. Found: C, 55.45; H, 4.04; N, 8.42. MS (ESI):  $m/z$  498.2[M+H]<sup>+</sup>.

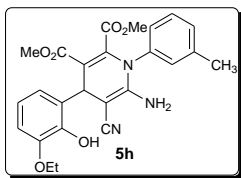

**Dimethyl 6-amino-5-cyano-4-(3-ethoxy-2-hydroxyphenyl)-1,4-**

**dihydro-1-*m*-tolylpyridine-2,3-dicarboxylate (5h).** White solid. Yield: 81%. R<sub>f</sub>: 0.25 (2:3 EtOAc/Hexane). mp: 199-201°C. IR (KBr): 3435, 3368, 2900, 2187, 1745, 1720, 1645, 1500, 1423, 1369, 1209, 1153, 1000, 789, 721, 598 cm<sup>-1</sup>. <sup>1</sup>H NMR (500 MHz, DMSO-d<sub>6</sub>/TMS):  $\delta =$

1.38 (t,  $J = 7$  Hz, 3H), 2.34 (s, 3H), 3.33 (s, 3H), 3.47 (s, 3H), 4.04 (q,  $J = 7$  Hz, 2H), 4.80 (s, 1H), 5.33 (s, 2H, -NH<sub>2</sub>), 6.72-6.76 (m, 2H), 6.81-6.83 (m, 1H), 7.13-7.16 (m, 2H), 7.30 (d,  $J = 7.5$  Hz, 1H), 7.37 (t,  $J = 7.5$  Hz, 1H), 8.50 (s, 1H, -OH). <sup>13</sup>C NMR (125 MHz, DMSO-d<sub>6</sub>/TMS):  $\delta = 14.7, 20.7, 33.3, 51.7, 52.2, 59.1, 63.9, 103.2, 111.0, 118.6, 120.2, 121.2, 127.2, 129.2, 130.4, 130.7, 131.4, 135.5, 139.1, 142.4, 144.0, 146.6, 151.2, 163.2, 165.4$ . Elemental Analyses for C<sub>25</sub>H<sub>25</sub>N<sub>3</sub>O<sub>6</sub> Calc: C, 64.79; H, 5.44; N, 9.07. Found: C, 67.80; H, 5.42; N, 9.08. MS (ESI):  $m/z$  464.7 [M+H]<sup>+</sup>.

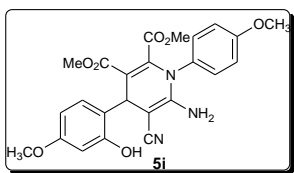

**Dimethyl 6-amino-5-cyano-1,4-dihydro-4-(2-hydroxy-4-**

**methoxyphenyl)-1-(4-methoxyphenyl)pyridine-2,3-dicarboxylate (5i).** White solid. Yield: 85%. R<sub>f</sub>: 0.25 (2:3 EtOAc/Hexane). mp: 203-205°C. IR (KBr): 3475, 3323, 2967, 2163, 1740, 1709, 1680, 1575, 1443, 1329, 1220, 1175, 1036, 726, 712, 589 cm<sup>-1</sup>. <sup>1</sup>H NMR

(500 MHz, DMSO-d<sub>6</sub>/TMS):  $\delta = 3.35$  (s, 3H), 3.48 (s, 3H), 3.68 (s, 3H), 3.79 (s, 3H), 4.65 (s, 1H), 5.29 (s, 2H, -NH<sub>2</sub>), 6.36-6.39 (m, 2H), 6.97-7.02 (m, 3H), 7.20 (d,  $J = 9$  Hz, 2H), 9.61 (s, 1H, -OH). <sup>13</sup>C NMR (125 MHz, DMSO-d<sub>6</sub>/TMS):  $\delta = 32.8, 51.7, 52.2, 54.9, 55.5, 59.3, 101.5, 103.2, 104.3, 108.7, 114.6, 121.4, 124.0, 128.0, 129.0, 131.5, 142.6, 151.3, 155.8, 159.0, 159.8, 163.4, 165.5$ . Elemental Analyses for C<sub>24</sub>H<sub>23</sub>N<sub>3</sub>O<sub>7</sub> Calc: C, 61.93; H, 4.98; N, 9.03. Found: C, 61.95; H, 4.97; N, 9.02. MS (ESI):  $m/z$  466.3 [M+H]<sup>+</sup>.

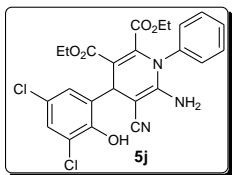

**Diethyl 6-amino-4-(3,5-dichloro-2-hydroxyphenyl)-5-cyano-1,4-**

**dihydro-1-phenylpyridine-2,3-dicarboxylate (5j).** White solid. Yield: 84%. R<sub>f</sub>: 0.25 (2:3 EtOAc/Hexane). mp: 210-212°C. IR (KBr): 3422, 3356, 2989, 2178, 1750, 1725, 1667, 1422, 1369, 1232, 1156, 1023, 777, 712, 533 cm<sup>-1</sup>. <sup>1</sup>H NMR (500 MHz, DMSO-d<sub>6</sub>/TMS):  $\delta = 0.82$  (t,  $J = 7$

Hz, 3H), 1.01 (t,  $J = 7$  Hz, 3H), 3.72-3.79 (m, 2H), 3.91-3.94 (m, 2H), 4.87 (s, 1H), 5.50 (s, 2H, -NH<sub>2</sub>), 7.11 (d,  $J = 3$  Hz, 1H), 7.36-7.37 (m, 2H), 7.41 (d,  $J = 3$  Hz, 1H), 7.50-7.51 (m, 3H), 9.79 (s, 1H, -OH). <sup>13</sup>C NMR (125 MHz, DMSO-d<sub>6</sub>/TMS):  $\delta = 13.1, 13.6, 34.8, 57.8, 60.4, 61.4, 102.4, 120.9, 121.7, 122.9, 127.4, 127.6, 129.5, 130.0, 130.7, 135.3, 135.7, 142.8, 149.9, 151.5, 162.3, 164.5$ . Elemental Analyses for C<sub>24</sub>H<sub>21</sub>Cl<sub>2</sub>N<sub>3</sub>O<sub>5</sub> Calc: C, 57.38; H, 4.21; N, 8.36. Found: C, 57.36; H, 4.22; N, 8.37. MS (ESI):  $m/z$  502.6 [M+H]<sup>+</sup>.

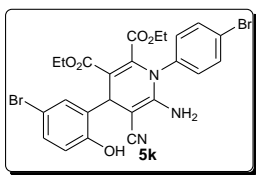

**Diethyl 6-amino-4-(5-bromo-2-hydroxyphenyl)-1-(4-bromophenyl)-5-cyano-1,4-dihydropyridine-2,3-dicarboxylate (5k).**

White solid. Yield: 79%.  $R_f$ : 0.25 (2:3 EtOAc/Hexane). mp: 207-209°C. IR (KBr): 3452, 3350, 2981, 2150, 1770, 1704, 1669, 1584, 1421, 1335, 1282, 1181, 1025, 795, 719, 582  $\text{cm}^{-1}$ .  $^1\text{H}$  NMR (500 MHz, DMSO- $d_6$ /TMS):  $\delta$  = 0.88 (t,  $J$  = 7 Hz, 3H), 1.03 (t,  $J$  = 7 Hz, 3H), 3.74-3.96 (m, 2H), 4.00-4.22 (m, 2H), 4.66 (s, 1H), 5.60 (s, 2H, -NH<sub>2</sub>), 6.78 (d,  $J$  = 8.5 Hz, 1H), 7.19-7.24 (m, 4H), 7.71 (d,  $J$  = 8.5 Hz, 2H), 9.99 (s, 1H, -OH).  $^{13}\text{C}$  NMR (125 MHz, DMSO- $d_6$ /TMS):  $\delta$  = 13.2, 13.7, 35.0, 59.8, 60.3, 61.4, 102.7, 109.8, 117.9, 121.1, 123.3, 130.4, 131.6, 132.5, 132.7, 133.2, 135.0, 142.3, 151.4, 155.0, 162.5, 164.6. Elemental Analyses for C<sub>24</sub>H<sub>21</sub>Br<sub>2</sub>N<sub>3</sub>O<sub>5</sub> Calc: C, 48.75; H, 3.58; N, 7.11. Found: C, 48.77; H, 3.57; N, 7.10. MS (ESI):  $m/z$  589.7 [M+H]<sup>+</sup>.

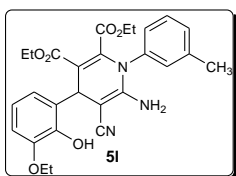

**Diethyl 6-amino-5-cyano-4-(3-ethoxy-2-hydroxyphenyl)-1,4-dihydro-1-m-tolylpyridine-2,3-dicarboxylate (5l).**

White solid. Yield: 80%.  $R_f$ : 0.20 (2:3 EtOAc/Hexane). mp: 198-200°C. IR (KBr): 3400, 3310, 2982, 2118, 1777, 1713, 1645, 1567, 1408, 1362, 1229, 1110, 1011, 795, 710, 545  $\text{cm}^{-1}$ .  $^1\text{H}$  NMR (500 MHz, DMSO- $d_6$ /TMS):  $\delta$  = 0.83 (t,  $J$  = 7 Hz, 3H), 1.01 (t,  $J$  = 7 Hz, 3H), 1.38 (t,  $J$  = 7 Hz, 3H), 2.34 (s, 3H), 3.72-3.83 (m, 2H), 3.90 (q,  $J$  = 7 Hz, 2H), 4.04 (q,  $J$  = 7 Hz, 2H), 4.80 (s, 1H), 5.30 (s, 2H, -NH<sub>2</sub>), 6.74-6.76 (m, 2H), 6.81-6.83 (m, 1H), 7.17 (d,  $J$  = 8.5 Hz, 2H), 7.30 (d,  $J$  = 8.5 Hz, 1H), 7.37 (t,  $J$  = 8.5 Hz, 1H), 8.48 (s, 1H, -OH).  $^{13}\text{C}$  NMR (125 MHz, DMSO- $d_6$ /TMS):  $\delta$  = 13.2, 13.7, 14.7, 20.7, 33.6, 58.9, 60.1, 61.1, 64.0, 103.3, 111.1, 113.5, 120.6, 121.3, 127.6, 129.2, 130.4, 131.1, 131.5, 135.5, 139.1, 142.2, 144.2, 146.5, 151.2, 162.7, 164.9. Elemental Analyses for C<sub>27</sub>H<sub>29</sub>N<sub>3</sub>O<sub>6</sub> Calc: C, 65.97; H, 5.95; N, 8.55. Found: C, 65.99; H, 5.94; N, 8.54. MS (ESI):  $m/z$  492.8 [M+H]<sup>+</sup>.

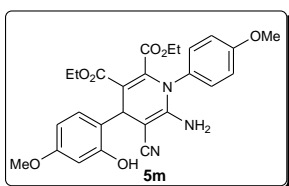

**Diethyl 6-amino-5-cyano-1,4-dihydro-4-(2-hydroxy-4-methoxyphenyl)-1-(4-methoxyphenyl)pyridine-2,3-dicarboxylate (5m).**

white solid. Yield: 81%.  $R_f$ : 0.25 (2:3 EtOAc/Hexane). mp: 183-185°C. IR (KBr): 3444, 3326, 2987, 2120, 1725, 1702, 1654, 1523, 1469, 1355, 1230, 1110, 1026, 770, 759, 530  $\text{cm}^{-1}$ .  $^1\text{H}$  NMR (500 MHz, DMSO- $d_6$ /TMS):  $\delta$  = 0.86 (t,  $J$  = 7 Hz, 3H), 1.03 (t,  $J$  = 7 Hz, 3H), 3.68 (s, 3H), 3.72-3.84 (m, 5H), 3.86-3.92 (m, 2H), 4.65 (s, 1H), 5.27 (s, 2H, -NH<sub>2</sub>), 6.36-6.41 (m, 2H), 7.00 (t,  $J$  = 8.5 Hz, 3H), 7.22 (d,  $J$  = 8.5 Hz, 2H), 9.59 (s, 1H, -OH).  $^{13}\text{C}$  NMR (125 MHz, DMSO- $d_6$ /TMS):  $\delta$  = 13.3, 13.8, 33.1, 54.9, 55.5, 59.1, 60.1, 61.1, 100.2, 101.4, 103.3, 104.2, 114.5, 121.5, 124.2, 128.0, 129.4, 131.8, 142.4, 151.4, 155.9, 159.0, 159.9, 162.9, 164.9. Elemental Analyses for C<sub>26</sub>H<sub>27</sub>N<sub>3</sub>O<sub>7</sub> Calc: C, 63.28; H, 5.51; N, 8.51. Found: C, 63.29; H, 5.49; N, 8.52. MS (ESI):  $m/z$  494.3 [M+H]<sup>+</sup>.

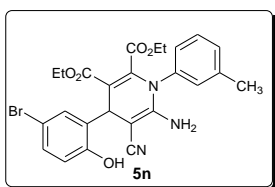

**Diethyl 6-amino-4-(5-bromo-2-hydroxyphenyl)-5-cyano-1,4-dihydro-1-m-tolylpyridine-2,3-dicarboxylate (5n).**

White solid. Yield: 84%.  $R_f$ : 0.25 (2:3 EtOAc/Hexane). mp: 206-208°C. IR (KBr):

3420, 3318, 2999, 2164, 1755, 1729, 1697, 1568, 1473, 1333, 1215, 1148, 1098, 795, 726, 569  $\text{cm}^{-1}$ .  $^1\text{H}$  NMR (500 MHz, DMSO- $d_6$ / TMS):  $\delta$  = 0.84 (t,  $J$  = 7 Hz, 3H), 1.04 (t,  $J$  = 7 Hz, 3H), 2.34 (s, 3H), 3.75-3.83 (m, 2H), 3.93 (q,  $J$  = 7 Hz, 2H), 4.70 (s, 1H), 5.44 (s, 2H, -NH<sub>2</sub>), 6.79-6.81 (m, 1H), 7.09-7.11 (m, 2H), 7.22-7.23 (m, 2H), 7.31 (d,  $J$  = 7.5 Hz, 1H), 7.38 (t,  $J$  = 7.5 Hz, 1H), 9.98 (s, 1H, -OH).  $^{13}\text{C}$  NMR (125 MHz, CDCl<sub>3</sub>/TMS):  $\delta$  = 13.3, 13.7, 21.1, 32.7, 60.0, 61.7, 61.9, 104.0, 112.6, 119.2, 120.6, 127.1, 129.6, 130.7, 131.1, 131.2, 131.7, 133.2, 134.7, 140.3, 142.2, 151.2, 152.9, 162.7, 166.4. Elemental Analyses for C<sub>25</sub>H<sub>24</sub>BrN<sub>3</sub>O<sub>5</sub> Calc: C, 57.04; H, 4.60; N, 7.98. Found: C, 57.03; H, 4.62; N, 7.97. MS (ESI):  $m/z$  526.6 [M+H]<sup>+</sup>.

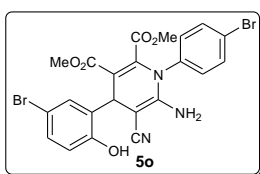

**Dimethyl 6-amino-4-(5-bromo-2-hydroxyphenyl)-1-(4-bromophenyl)-5-cyano-1,4-dihydropyridine-2,3-dicarboxylate**

**(5o)**. White solid. Yield: 82%.  $R_f$ : 0.25 (2:3 EtOAc/Hexane). mp: 214-216°C. IR (KBr): 3488, 3334, 2927, 2146, 1753, 1705, 1666, 1509, 1463, 1325, 1227, 1180, 1000, 780, 726, 690  $\text{cm}^{-1}$ .  $^1\text{H}$  NMR (500 MHz, DMSO- $d_6$ / TMS):  $\delta$  = 3.38 (s, 3H), 3.49 (s, 3H), 4.67 (s, 1H), 5.65 (s, 2H, -NH<sub>2</sub>), 6.78 (d,  $J$  = 8.5 Hz, 1H), 7.16-7.31 (m, 4H), 7.71 (d,  $J$  = 8.5 Hz, 2H), 10.03 (s, 1H, -OH).  $^{13}\text{C}$  NMR (125 MHz, DMSO- $d_6$ /TMS):  $\delta$  = 34.3, 51.9, 52.5, 58.3, 102.9, 109.9, 118.0, 121.0, 123.3, 130.5, 131.0, 132.3, 132.6, 133.3, 135.1, 142.5, 151.4, 154.7, 163.1, 165.1. Elemental Analyses for C<sub>22</sub>H<sub>17</sub>Br<sub>2</sub>N<sub>3</sub>O<sub>5</sub> Calc: C, 46.92; H, 3.04; N, 7.46. Found: C, 46.90; H, 3.05; N, 7.47. MS (ESI):  $m/z$  561.2 [M+H]<sup>+</sup>.

**Typical procedure for the synthesis of dihydropyridinones (13a-f)<sup>22</sup>**

To a mixture of dihydropyridine **5** (1 mmol), 1N hydrochloric acid (1-2mL) was added and the reaction mixture was stirred under reflux at 75°C for 30 minutes. The resultant solid was filtered off and recrystallized from methanol to afford the dihydropyridinones **13a-f**.

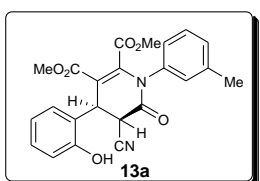

**(4S,5R)-Dimethyl-5-cyano-1,4,5,6-tetrahydro-4-(2-hydroxyphenyl)-6-oxo-1-m-tolylpyridine-2,3-dicarboxylate (13a)**

Yellow solid. Yield: 85%.  $R_f$ : 0.30 (2:3 EtOAc/Hexane). mp: 238-240°C. IR (KBr): 3330, 2986, 2187, 1740, 1723, 1699, 1563, 1428, 1364, 1296, 1122, 1065, 1036, 999, 710  $\text{cm}^{-1}$ .  $^1\text{H}$  NMR (500 MHz, DMSO- $d_6$ / TMS):  $\delta$  = 2.34 (s, 3H), 3.34 (s, 3H), 3.56 (s, 3H), 4.71 (d,  $J$  = 9 Hz, 1H), 5.30 (d,  $J$  = 8.5 Hz, 1H), 6.81-6.87 (m, 2H), 6.99-7.10 (m, 2H), 7.14-7.20 (m, 2H), 7.26 (d,  $J$  = 7.5 Hz, 1H), 7.35 (d,  $J$  = 7.5 Hz, 1H), 10.20 (s, 1H, -OH).  $^{13}\text{C}$  NMR (125 MHz, DMSO- $d_6$ /TMS):  $\delta$  = 20.7, 35.7, 52.2, 52.3, 115.3, 115.4, 119.2, 128.7, 129.4, 129.6, 129.9, 136.0, 138.5, 142.9, 155.9, 162.3, 162.4, 164.6. Elemental Analyses for C<sub>23</sub>H<sub>20</sub>N<sub>2</sub>O<sub>6</sub> Calc: C, 65.71; H, 4.79; N, 6.66. Found: C, 65.73; H, 4.78; N, 6.65. MS (ESI):  $m/z$  421.2 [M+H]<sup>+</sup>.

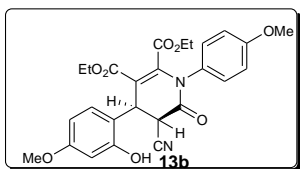

**(4S,5R)-Diethyl 5-cyano-1,4,5,6-tetrahydro-4-(2-hydroxy-4-methoxyphenyl)-1-(4-methoxyphenyl)-6-oxopyridine-2,3-dicarboxylate (13b)**. Yellow solid. Yield: 83%.  $R_f$ : 0.30 (2:3

EtOAc/Hexane), mp: 226-228°C. IR (KBr): 3392, 2950, 2181, 1739, 1707, 1620, 1514, 1436, 1325, 1233, 1104, 1063, 1035, 957, 708 cm<sup>-1</sup>. <sup>1</sup>H NMR (500 MHz, DMSO-d<sub>6</sub>/TMS): δ = 0.85 (t, *J* = 7 Hz, 3H), 1.10 (t, *J* = 7 Hz, 3H), 3.69 (s, 3H), 3.77 (s, 3H), 3.79-3.90 (m, 2H), 3.97-4.01 (m, 2H), 4.61 (d, *J* = 9 Hz, 1H), 5.25 (d, *J* = 9.5 Hz, 1H), 6.40-6.44 (m, 2H), 6.99-7.01 (m, 2H), 7.08-7.28 (m, 3H), 10.23 (s, 1H, -OH). <sup>13</sup>C NMR (125 MHz, DMSO-d<sub>6</sub>/TMS): δ = 13.2, 13.8, 36.3, 54.9, 55.5, 60.7, 61.4, 101.1, 104.5, 105.5, 113.9, 114.0, 115.5, 115.7, 128.5, 130.7, 142.8, 156.8, 159.5, 160.0, 161.8, 162.7, 164.1 Elemental Analyses for C<sub>26</sub>H<sub>26</sub>N<sub>2</sub>O<sub>8</sub> Calc: C, 63.15; H, 5.30; N, 5.67. Found: C, 63.17; H, 5.29; N, 5.66; MS (ESI): *m/z* 495.7 [M+H]<sup>+</sup>.

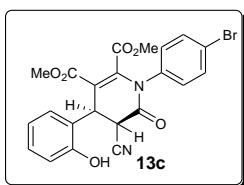

**(4*S*,5*R*)-Dimethyl 1-(4-bromophenyl)-5-cyano-1,4,5,6-tetrahydro-4-(2-hydroxyphenyl)-6-oxopyridine-2,3-dicarboxylate (13c).** Yellow solid. Yield: 80%. R<sub>f</sub>: 0.35 (2:3 EtOAc/Hexane). mp: 221-223°C. IR (KBr): 3398, 2956, 2119, 1740, 1726, 1632, 1523, 1467, 1364, 1264, 1102, 1066, 1034, 980, 710 cm<sup>-1</sup>. <sup>1</sup>H NMR (500 MHz, DMSO-d<sub>6</sub>/TMS): δ = 3.38 (s, 3H), 3.57 (s, 3H), 4.70 (d, *J* = 9 Hz, 1H), 5.29 (d, *J* = 8.5 Hz, 1H), 6.80-6.86 (m, 2H), 7.14-7.20 (m, 2H), 7.25 (d, *J* = 8.5 Hz, 2H), 7.70 (d, *J* = 8.5 Hz, 2H), 10.22 (s, 1H, -OH). <sup>13</sup>C NMR (125 MHz, DMSO-d<sub>6</sub>/TMS): δ = 21.1, 37.4, 52.2, 52.6, 105.9, 115.2, 115.5, 119.2, 122.5, 123.0, 129.4, 130.8, 132.1, 135.5, 142.2, 155.9, 162.2, 162.4, 164.6. Elemental Analyses for C<sub>22</sub>H<sub>17</sub>BrN<sub>2</sub>O<sub>6</sub> Calc: C, 54.45; H, 3.53; N, 5.77. Found: C, 54.43; H, 3.54; N, 5.78. MS (ESI): *m/z* 485.3 [M+H]<sup>+</sup>.

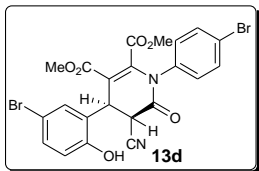

**(4*S*,5*R*)-Dimethyl 4-(5-bromo-2-hydroxyphenyl)-1-(4-bromophenyl)-5-cyano-1,4,5,6-tetrahydro-6-oxopyridine-2,3-dicarboxylate (13d).** Yellow solid. Yield: 79%. R<sub>f</sub>: 0.30 (2:3 EtOAc/Hexane). mp: 242-244°C. IR (KBr): 3375, 2963, 2177, 1734, 1710, 1648, 1523, 1419, 1329, 1230, 1110, 1000, 723 cm<sup>-1</sup>. <sup>1</sup>H NMR (500 MHz, DMSO-d<sub>6</sub>/TMS): δ = 3.38 (s, 3H), 3.59 (s, 3H), 4.66 (d, *J* = 9 Hz, 1H), 5.30 (d, *J* = 8.5 Hz, 1H), 6.82 (d, *J* = 8.5 Hz, 1H), 7.18-7.20 (m, 2H), 7.32-7.36 (m, 2H), 7.72 (d, *J* = 9 Hz, 2H), 10.69 (s, 1H, -OH). <sup>13</sup>C NMR (125 MHz, DMSO-d<sub>6</sub>/TMS): δ = 37.7, 52.4, 52.7, 104.9, 109.8, 115.2, 117.6, 122.7, 125.8, 130.7, 132.0, 132.2, 133.7, 135.4, 142.5, 155.5, 162.2, 162.4, 164.5. Elemental Analyses for C<sub>22</sub>H<sub>16</sub>Br<sub>2</sub>N<sub>2</sub>O<sub>6</sub> Calc: C, 46.84; H, 2.86; N, 4.97. Found: C, 46.86; H, 2.85; N, 4.96. MS (ESI): *m/z* 562.7 [M+H]<sup>+</sup>.

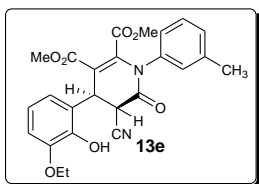

**(4*S*,5*R*)-Dimethyl 5-cyano-4-(3-ethoxy-2-hydroxyphenyl)-1,4,5,6-tetrahydro-6-oxo-1-*m*-tolylpyridine-2,3-dicarboxylate (13e).** Yellow solid. Yield: 82%. R<sub>f</sub>: 0.30 (2:3 EtOAc/Hexane). mp: 237-239°C. IR (KBr): 3359, 2945, 2180, 1778, 1745, 1636, 1523, 1438, 1331, 1213, 1156, 1019, 960, 700 cm<sup>-1</sup>. <sup>1</sup>H NMR (500 MHz, DMSO-d<sub>6</sub>/TMS): δ = 1.38 (t, *J* = 7 Hz, 3H), 2.35 (s, 3H), 3.34 (s, 3H), 3.55 (s, 3H), 4.05 (q, *J* = 7 Hz, 2H), 4.82 (d, *J* = 8.5 Hz, 1H), 5.33 (d, *J* = 8.5 Hz, 1H), 6.77-6.82 (m, 3H), 6.90-6.92 (m, 1H), 7.03-7.07 (m, 1H), 7.26 (d, *J* = 7.5 Hz, 1H), 7.34-7.37 (m, 1H), 9.15 (s, 1H, -OH). <sup>13</sup>C NMR (125 MHz, DMSO-d<sub>6</sub>/TMS): δ = 14.7, 20.8, 35.4, 52.2, 52.4, 64.0, 112.4, 115.3, 119.1,



123.3, 128.7, 129.9, 136.0, 138.5, 143.0, 145.1, 146.7, 162.2, 162.3, 164.7. Elemental Analyses for  $C_{25}H_{24}N_2O_7$  Calc: C, 64.65; H, 5.21; N, 6.03. Found: C, 64.67; H, 5.20; N, 6.02. MS (ESI):  $m/z$  465.3  $[M+H]^+$ .

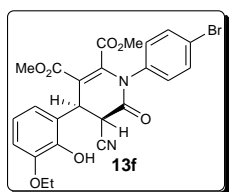

**(4*S*,5*R*)-Dimethyl 1-(4-bromophenyl)-5-cyano-4-(3-ethoxy-2-hydroxyphenyl)-1,4,5,6-tetrahydro-6-oxopyridine-2,3-dicarboxylate**

**(13f)**. Yellow solid. Yield: 77%.  $R_f$ : 0.30 (2:3 EtOAc/Hexane). mp: 230-232°C. IR (KBr): 3398, 2963, 2196, 1703, 1710, 1623, 1553, 1469, 1300, 1296, 1167, 1100, 1019, 946, 723  $cm^{-1}$ .  $^1H$  NMR (500 MHz, DMSO- $d_6$ /TMS):  $\delta$  = 1.38 (t,  $J$  = 7 Hz, 3H), 3.37 (s, 3H), 3.56 (s, 3H), 4.05 (q,  $J$  = 7 Hz, 2H), 4.75 (d,  $J$  = 8.5 Hz, 1H), 5.29 (d,  $J$  = 8.5 Hz, 1H), 6.73-6.80 (m, 2H), 6.90-6.92 (m, 1H), 7.21-7.47 (m, 2H), 7.68 (d,  $J$  = 8 Hz, 2H), 9.16 (s, 1H, -OH).  $^{13}C$  NMR (125 MHz, DMSO- $d_6$ /TMS):  $\delta$  = 14.7, 36.8, 52.2, 52.6, 63.9, 105.8, 112.3, 115.1, 118.9, 121.9, 122.6, 123.2, 131.7, 132.0, 135.4, 142.3, 145.1, 146.6, 162.2, 162.3, 164.6. Elemental Analyses for  $C_{24}H_{21}BrN_2O_7$  Calc: C, 54.46; H, 4.00; N, 5.29. Found: C, 54.48; H, 3.99; N, 5.28. MS (ESI):  $m/z$  529.2  $[M+H]^+$ .

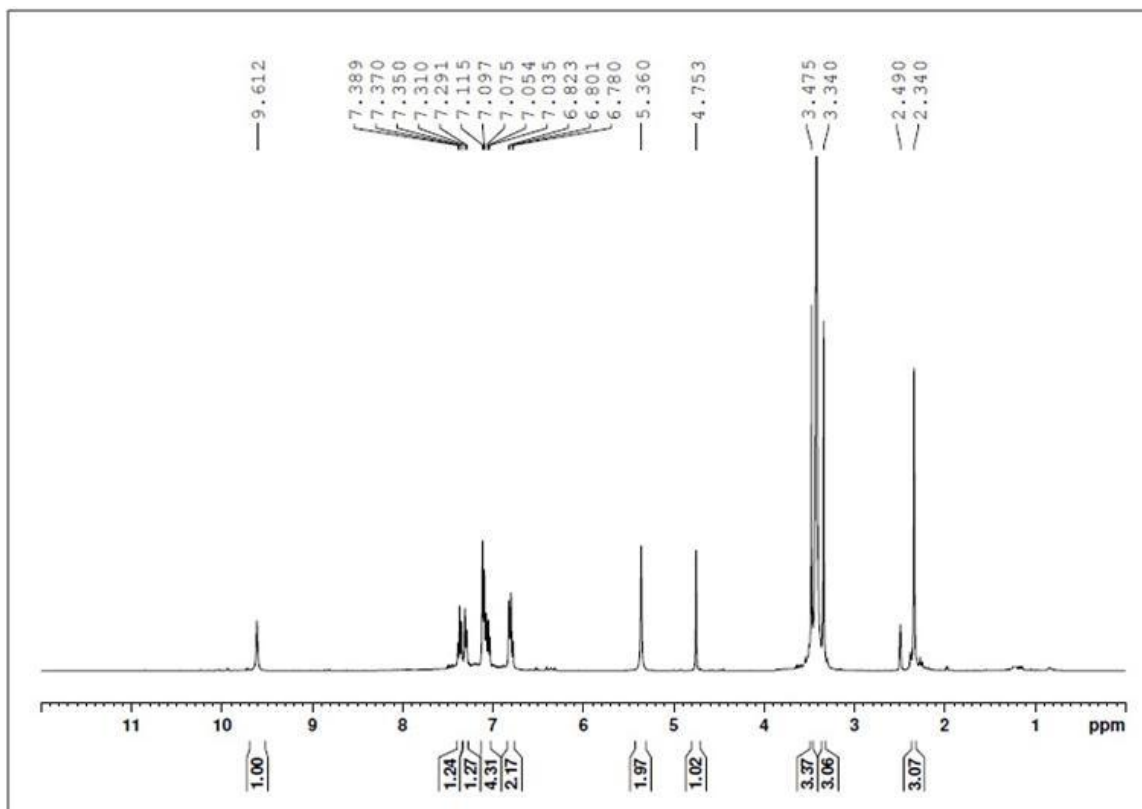

<sup>1</sup>H NMR spectrum of compound **5a**

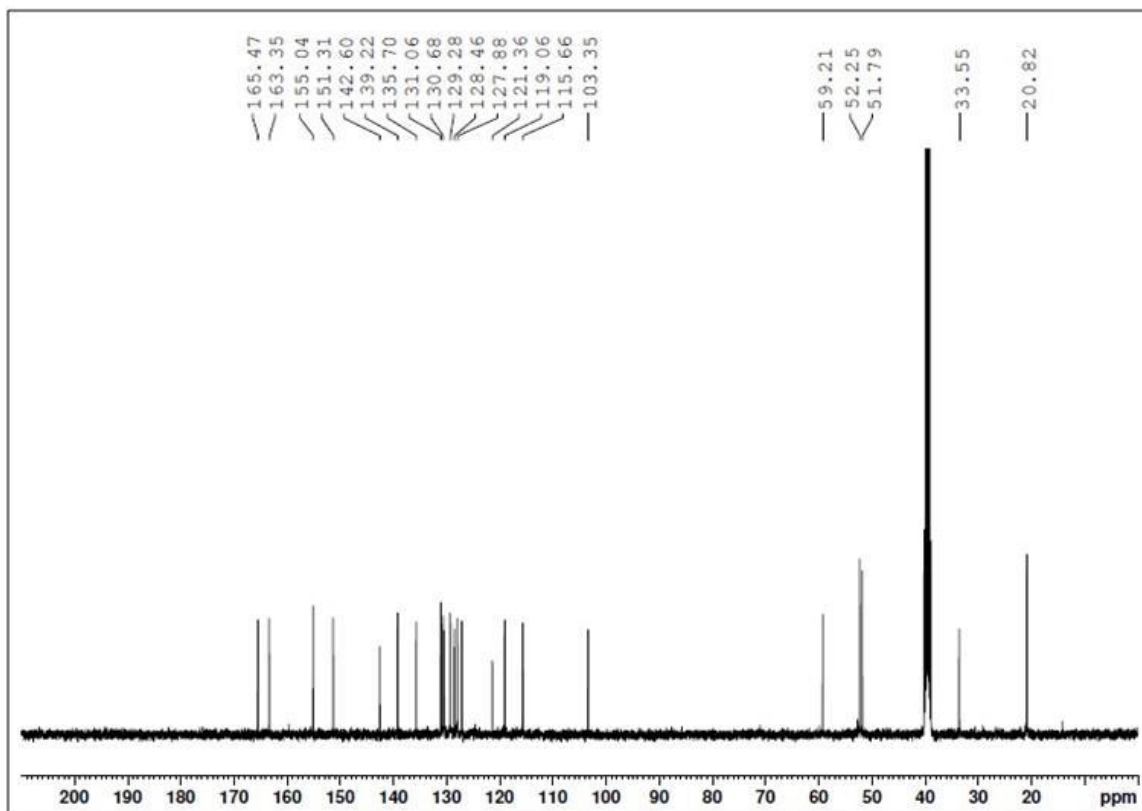

<sup>13</sup>C NMR spectrum of compound **5a**

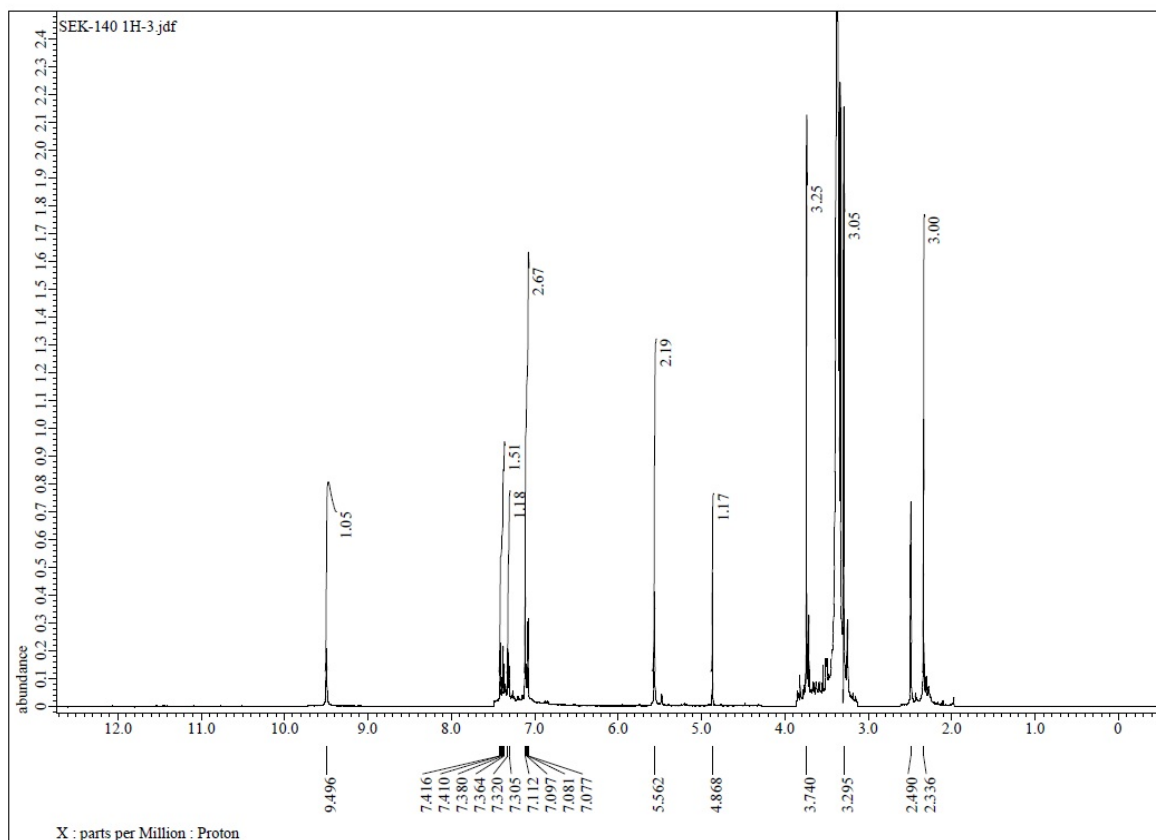

$^1\text{H}$  NMR spectrum of compound **5b**

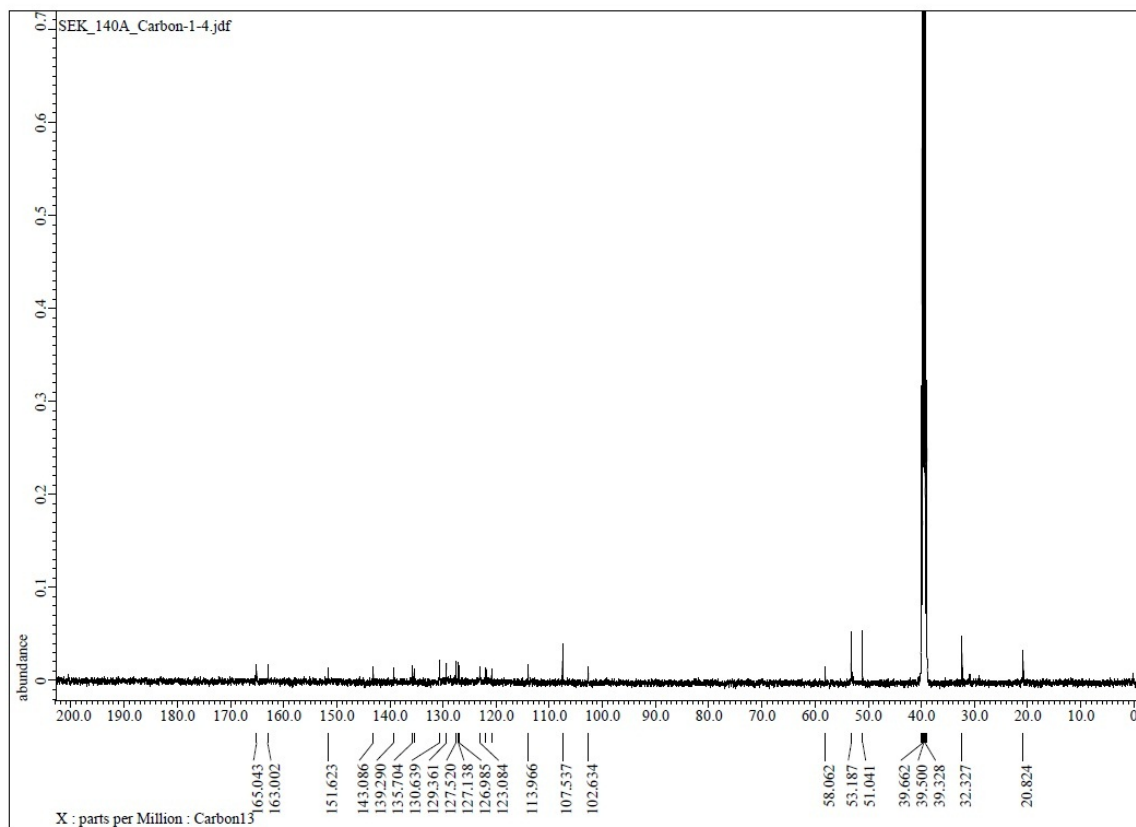

$^{13}\text{C}$  NMR spectrum of compound **5b**

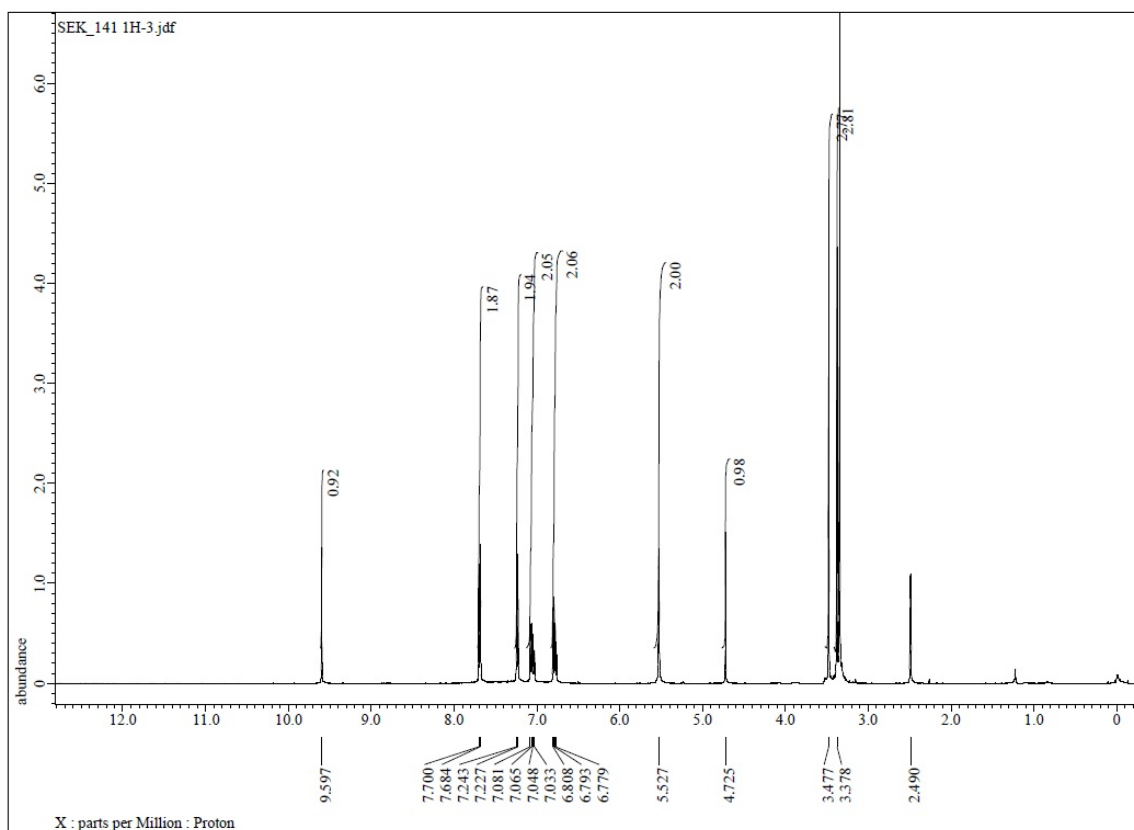

$^1\text{H}$  NMR spectrum of compound **5c**

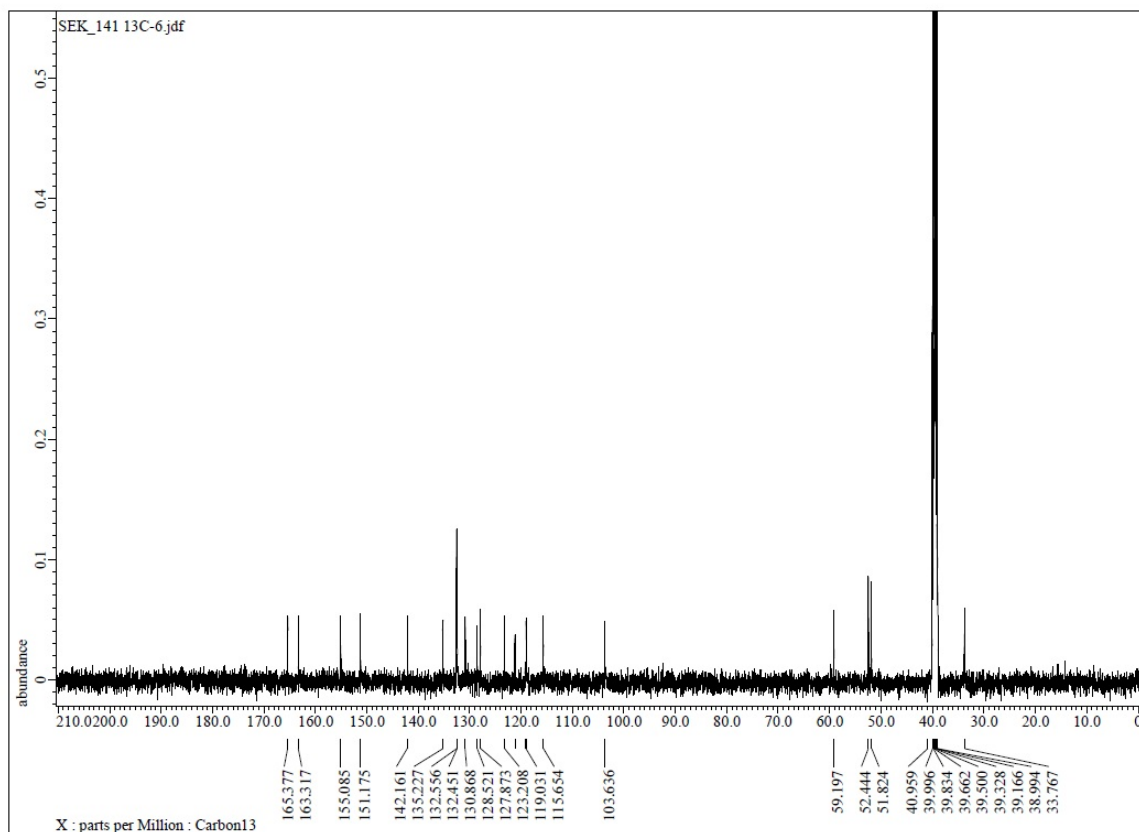

$^{13}\text{C}$  NMR spectrum of compound **5c**

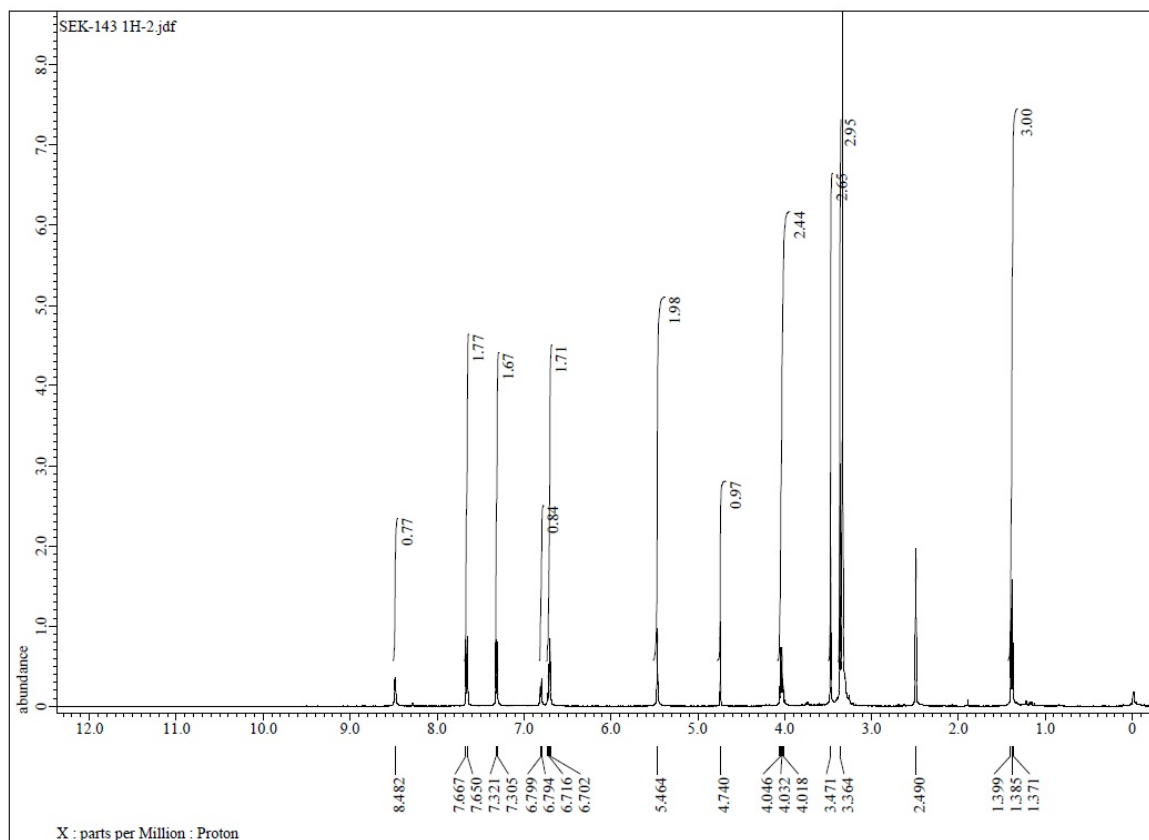

$^1\text{H}$  NMR spectrum of compound **5d**

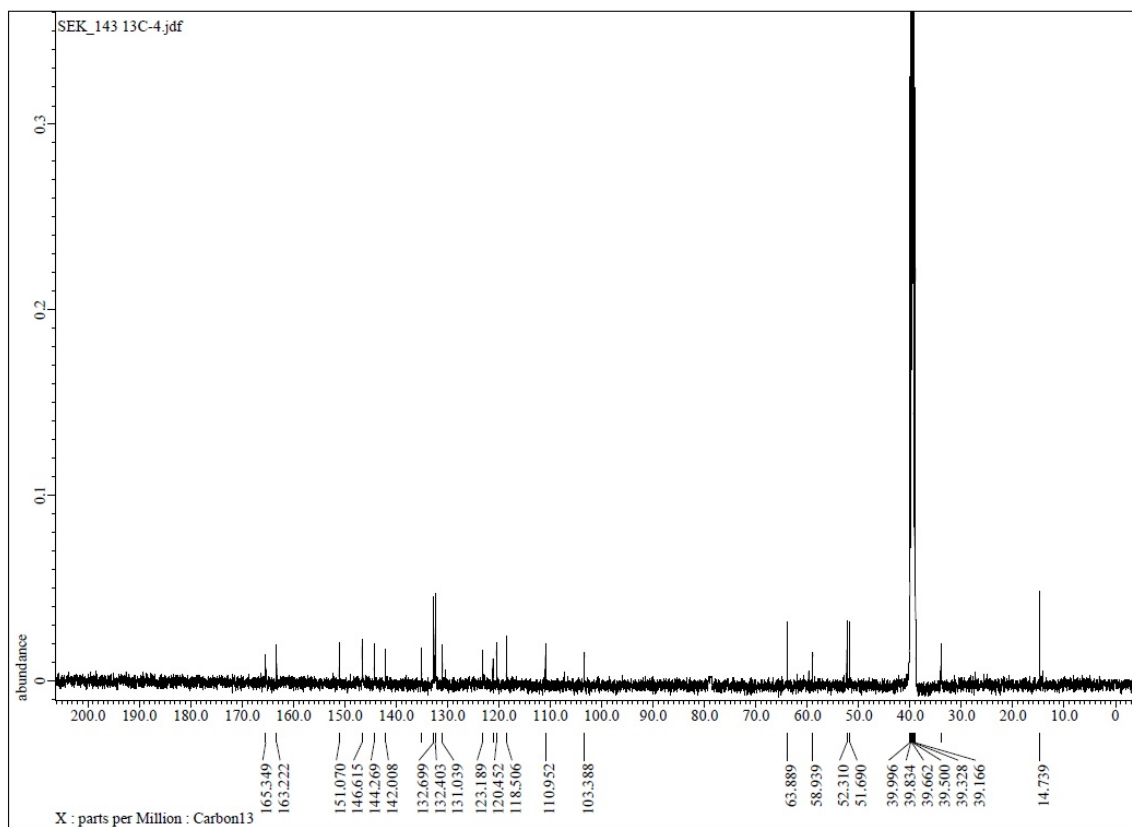

$^{13}\text{C}$  NMR spectrum of compound **5d**

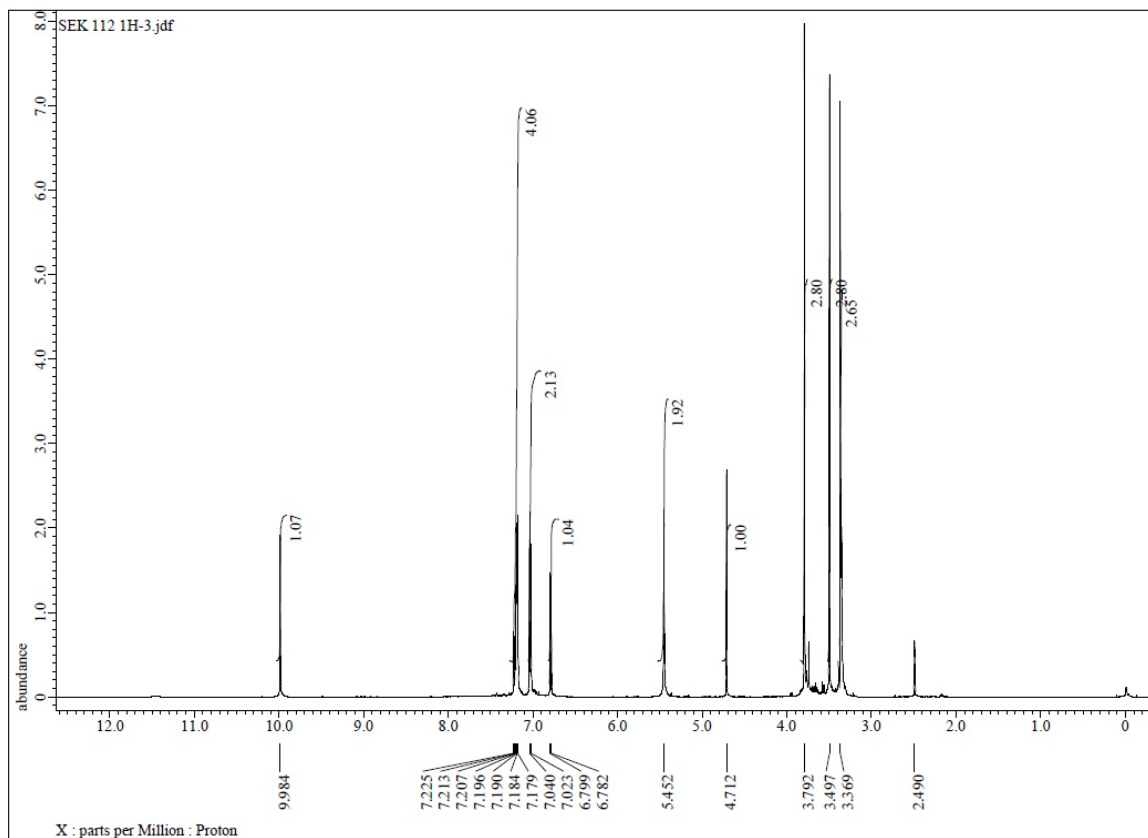

$^1\text{H}$  NMR spectrum of compound **5e**

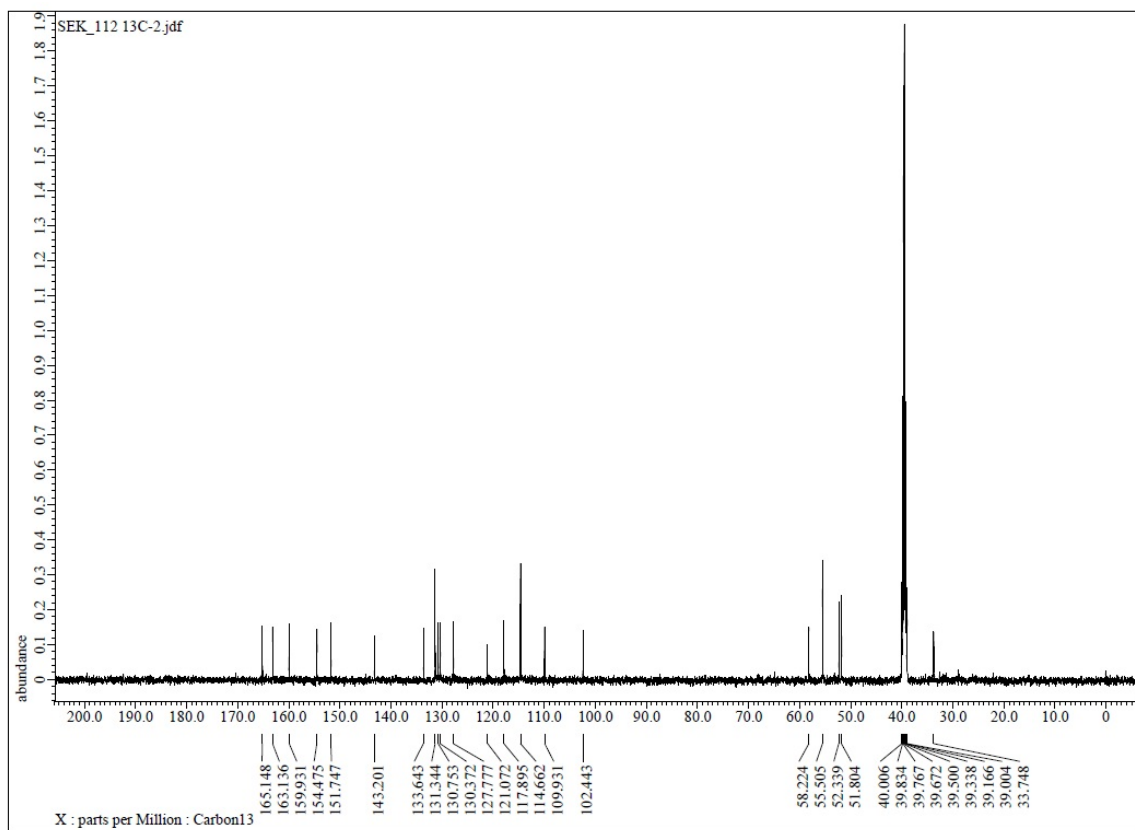

$^{13}\text{C}$  NMR spectrum of compound **5e**

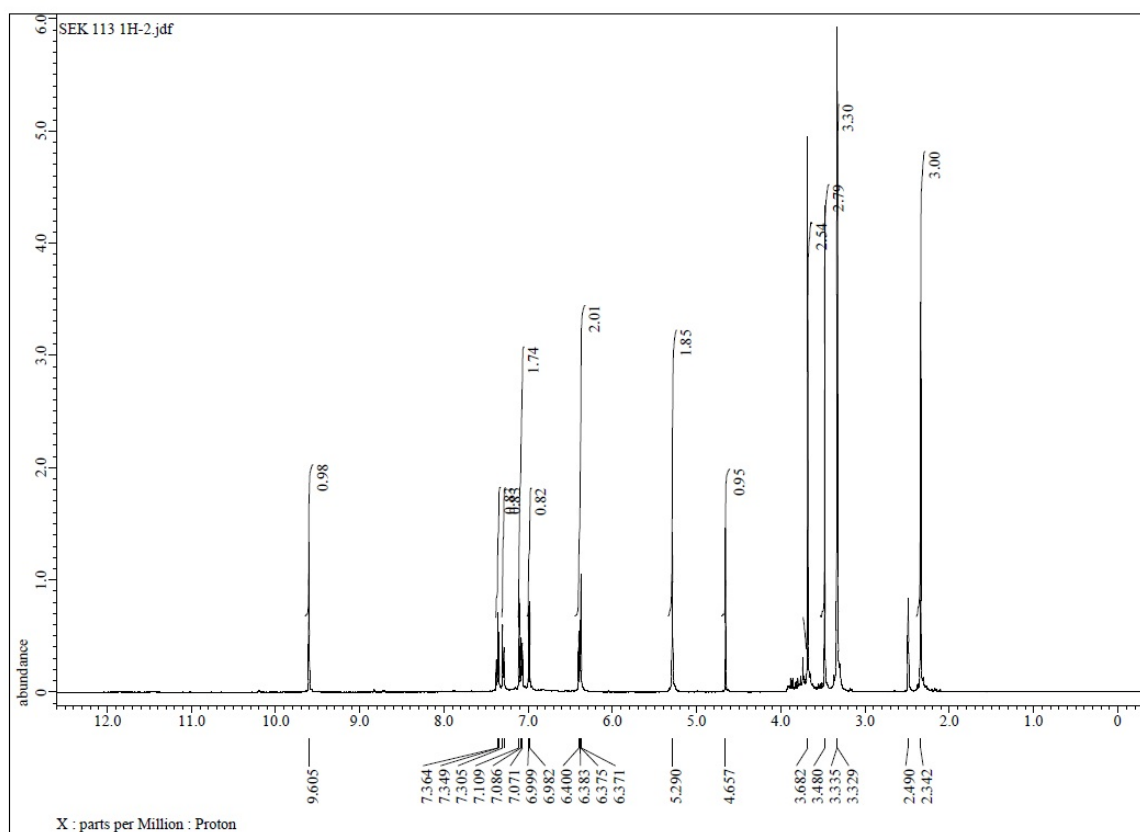

$^1\text{H}$  NMR spectrum of compound **5f**

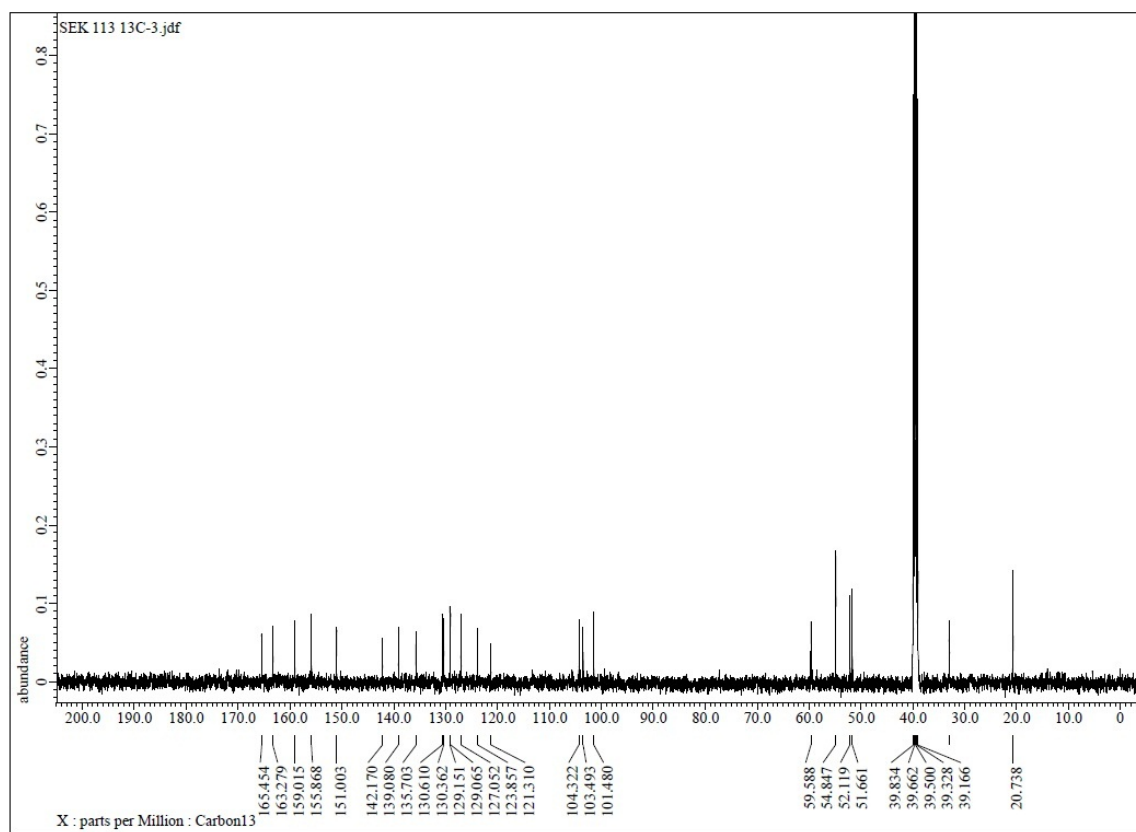

$^{13}\text{C}$  NMR spectrum of compound **5f**

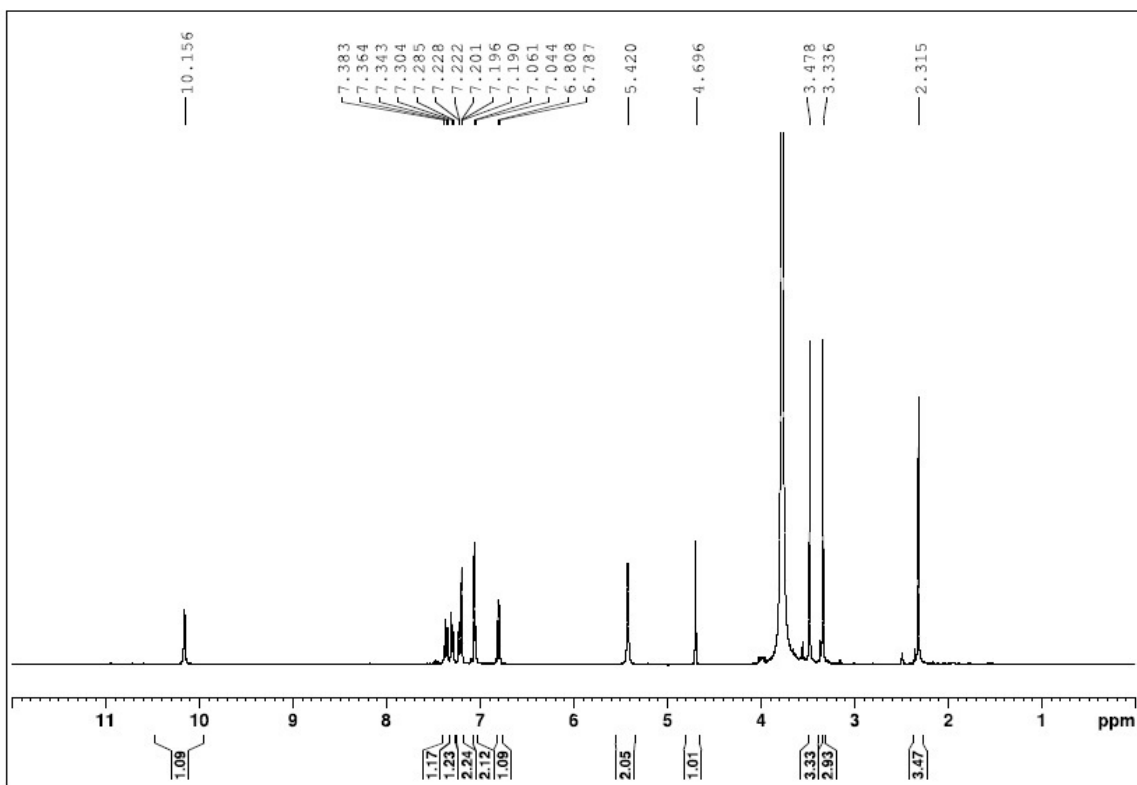

<sup>1</sup>H NMR spectrum of compound **5g**

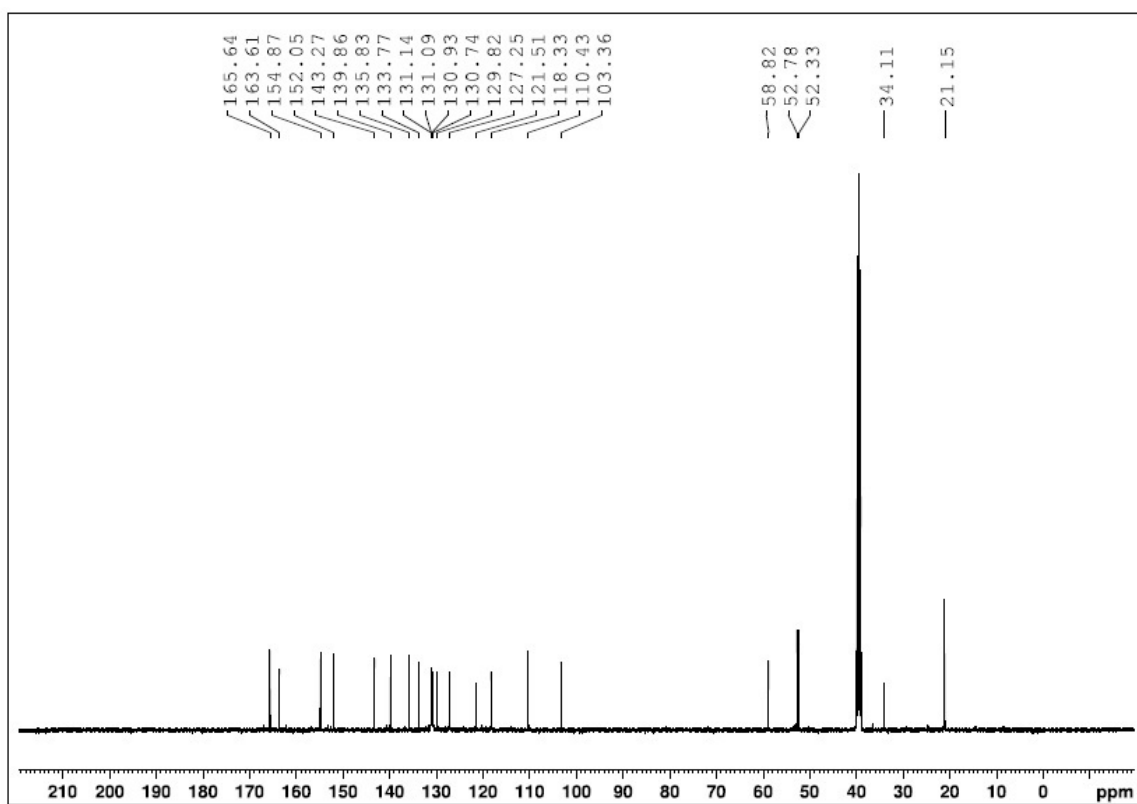

<sup>13</sup>C NMR spectrum of compound **5g**



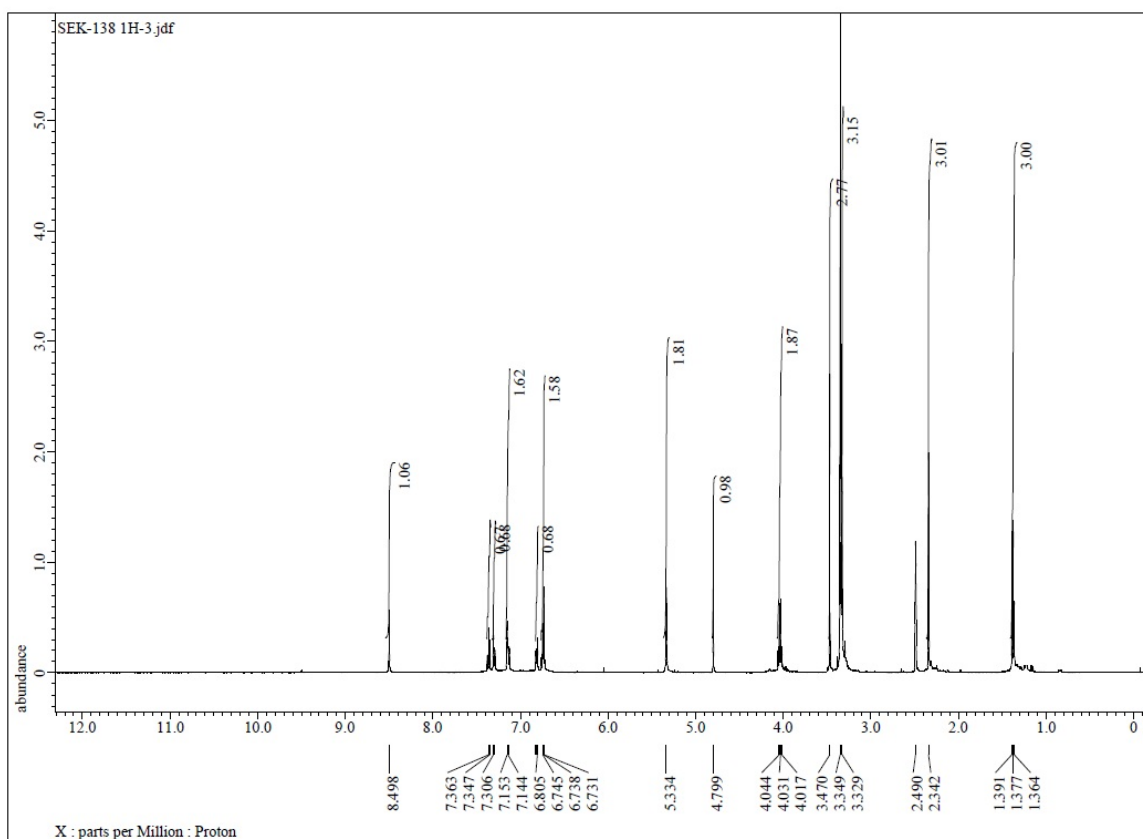

$^1\text{H}$  NMR spectrum of compound **5h**

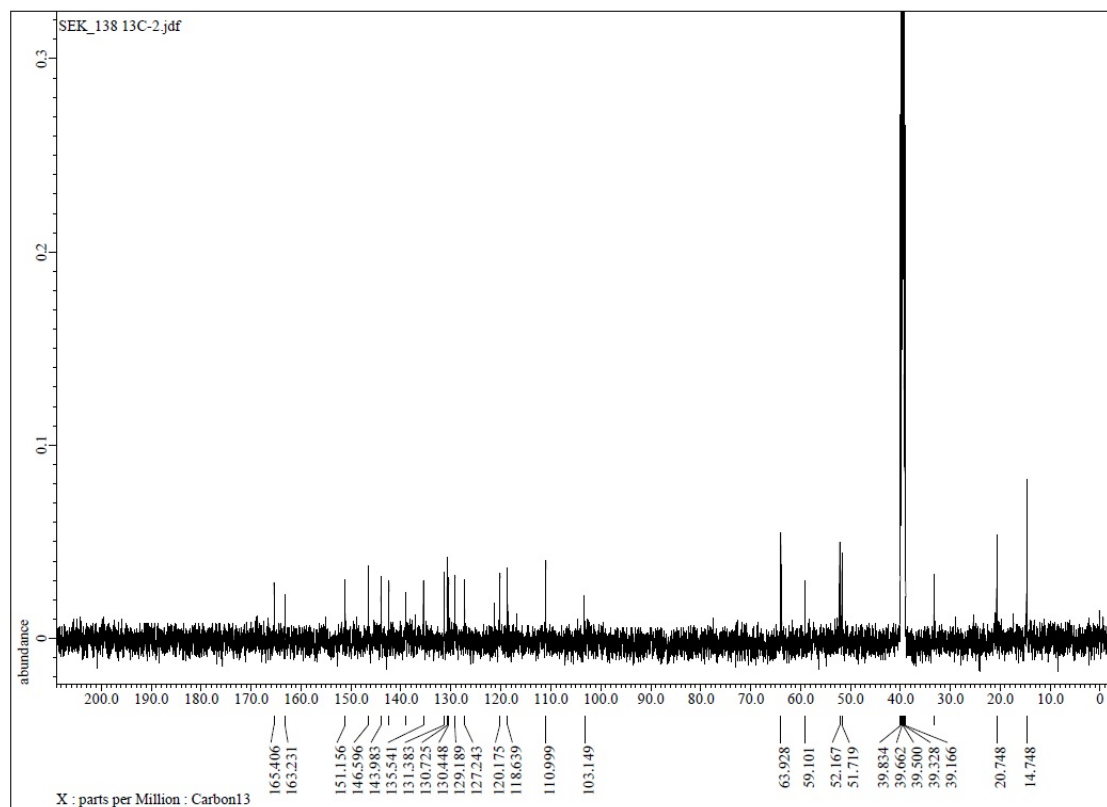

$^{13}\text{C}$  NMR spectrum of compound **5h**

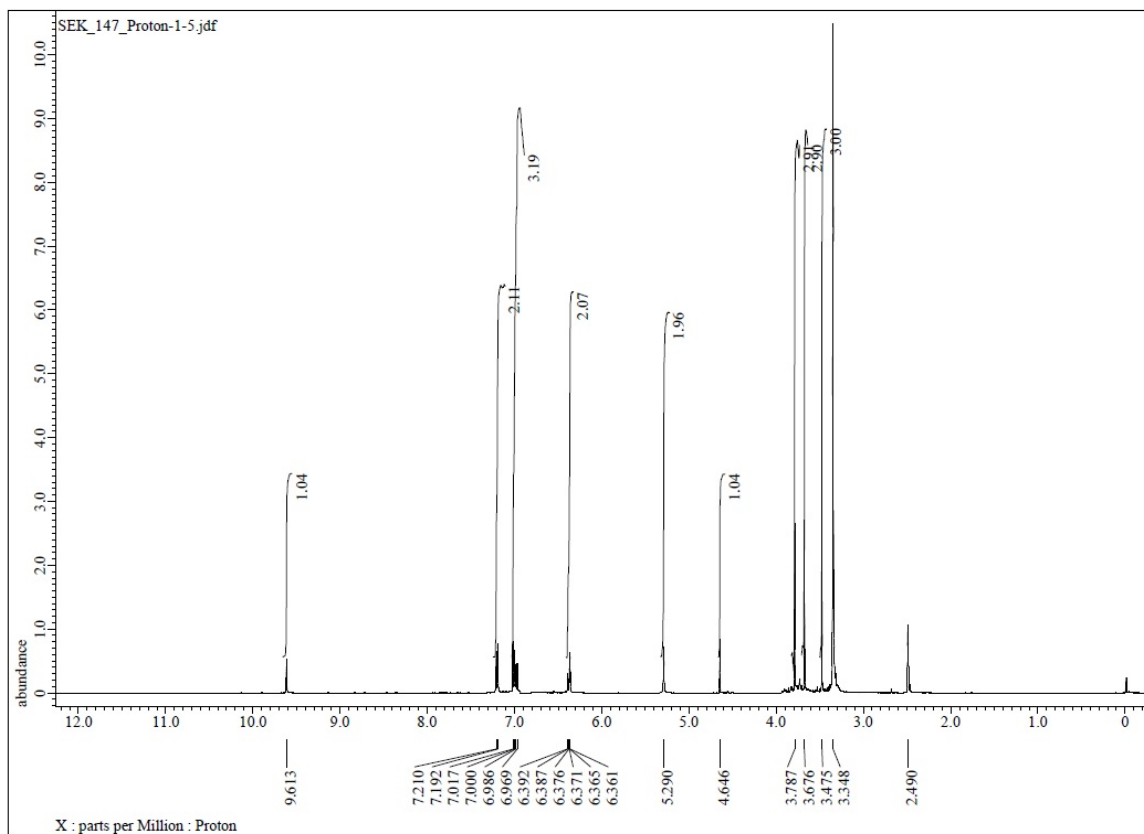

$^1\text{H}$  NMR spectrum of compound **5i**

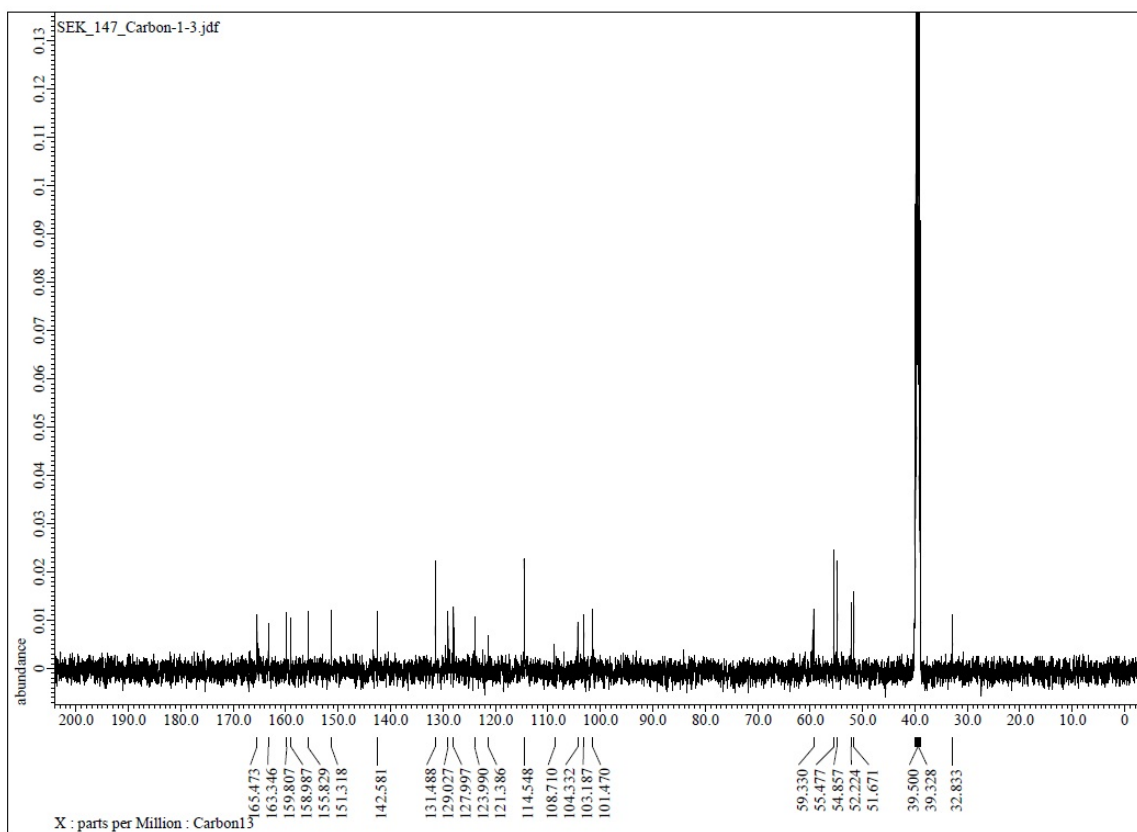

$^{13}\text{C}$  NMR spectrum of compound **5i**

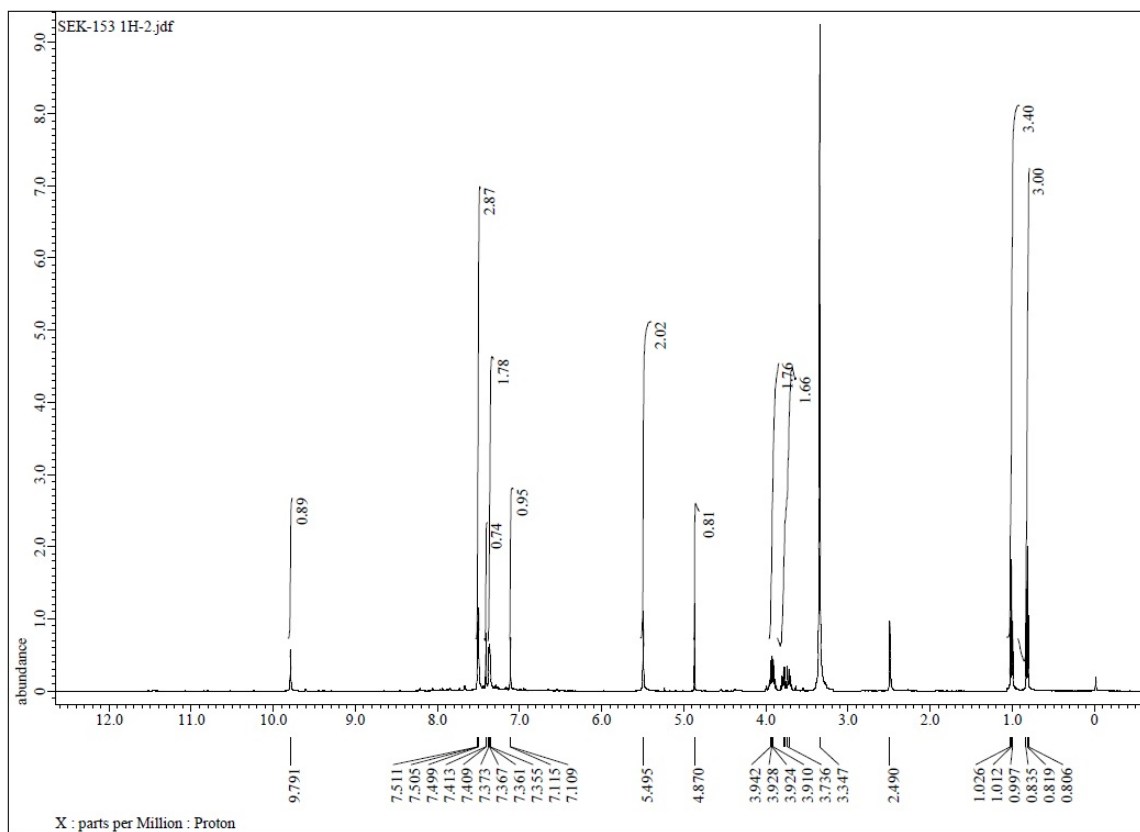

<sup>1</sup>H NMR spectrum of compound **5j**

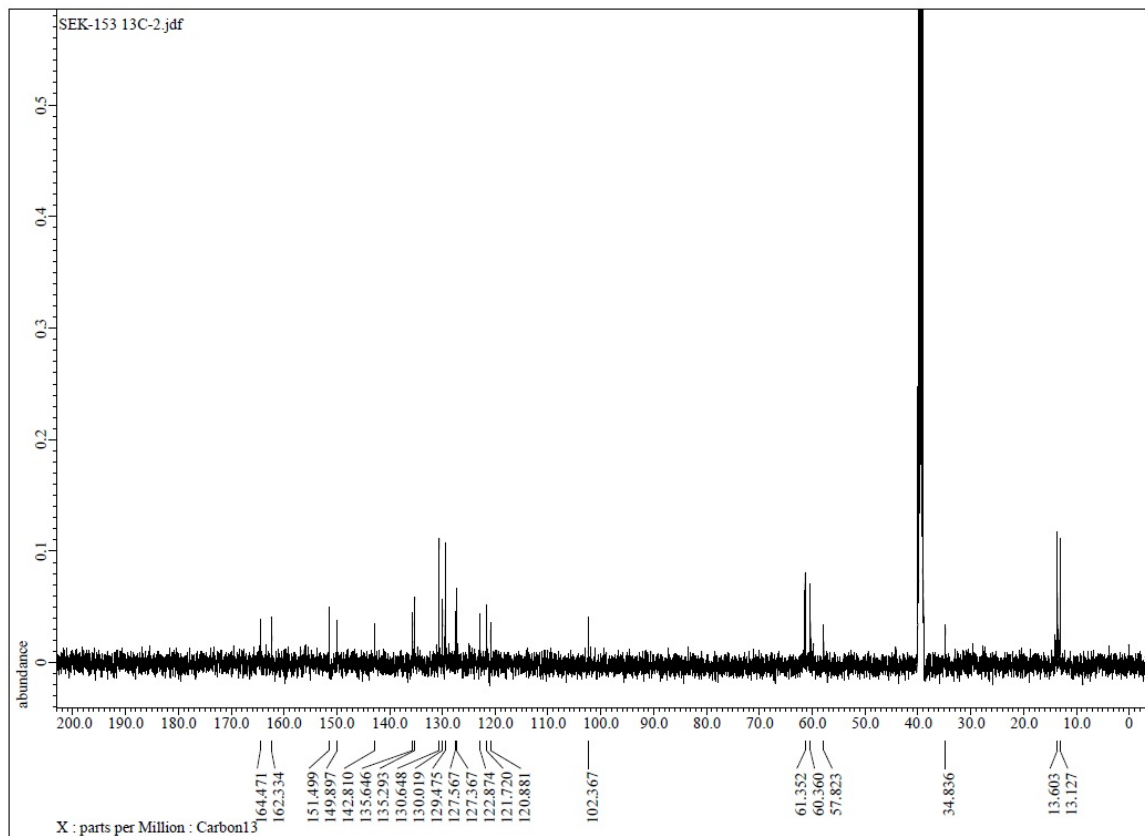

<sup>13</sup>C NMR spectrum of compound **5j**

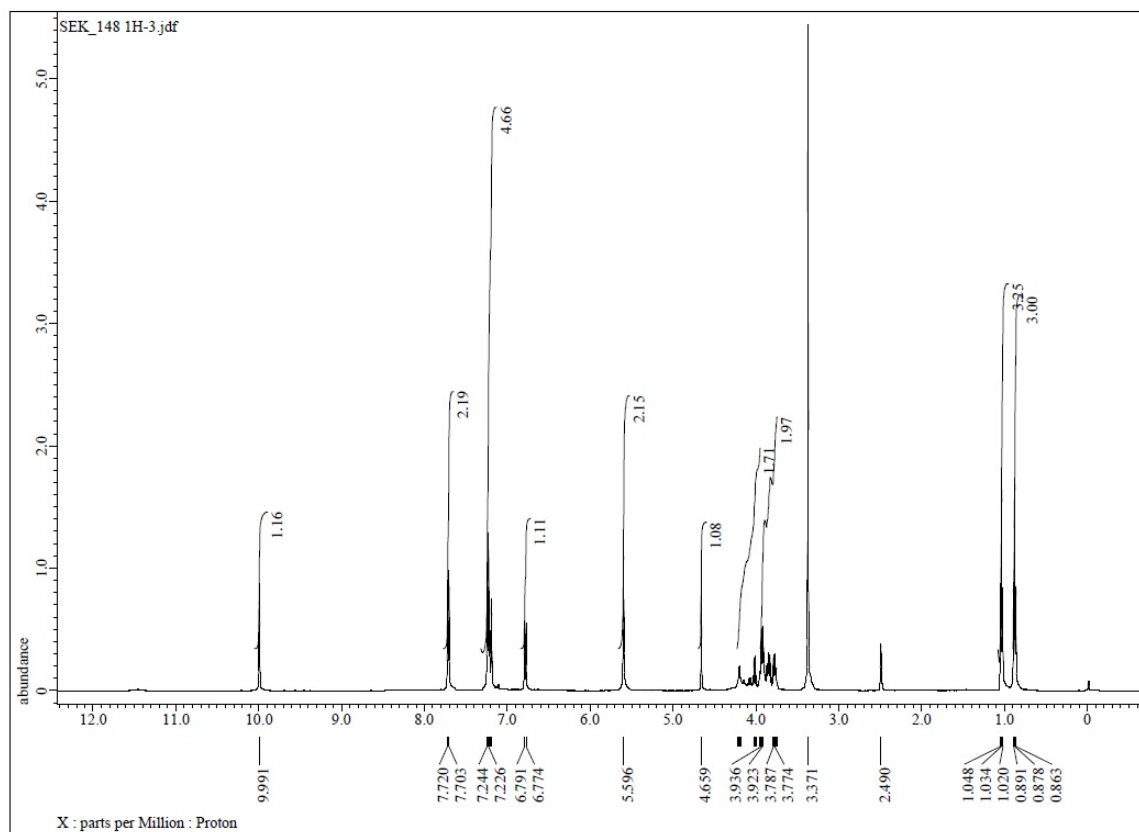

<sup>1</sup>H NMR spectrum of compound **5k**

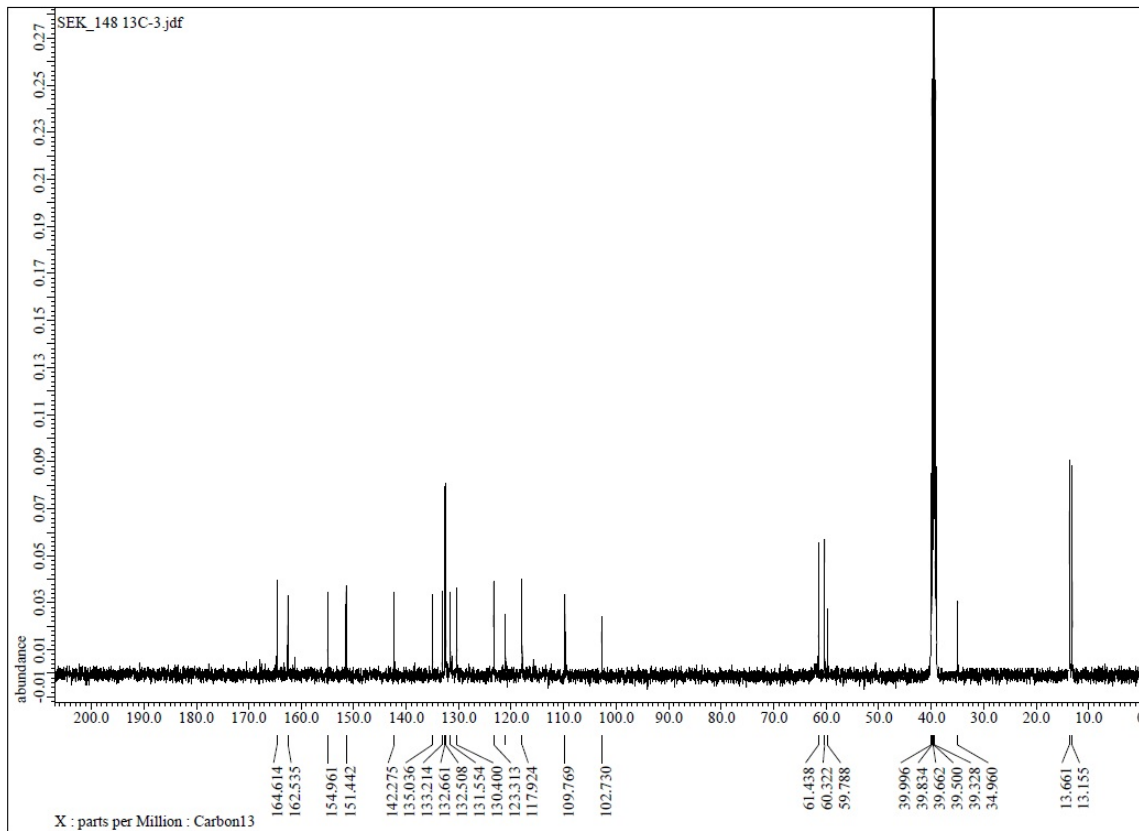

<sup>13</sup>C NMR spectrum of compound **5k**

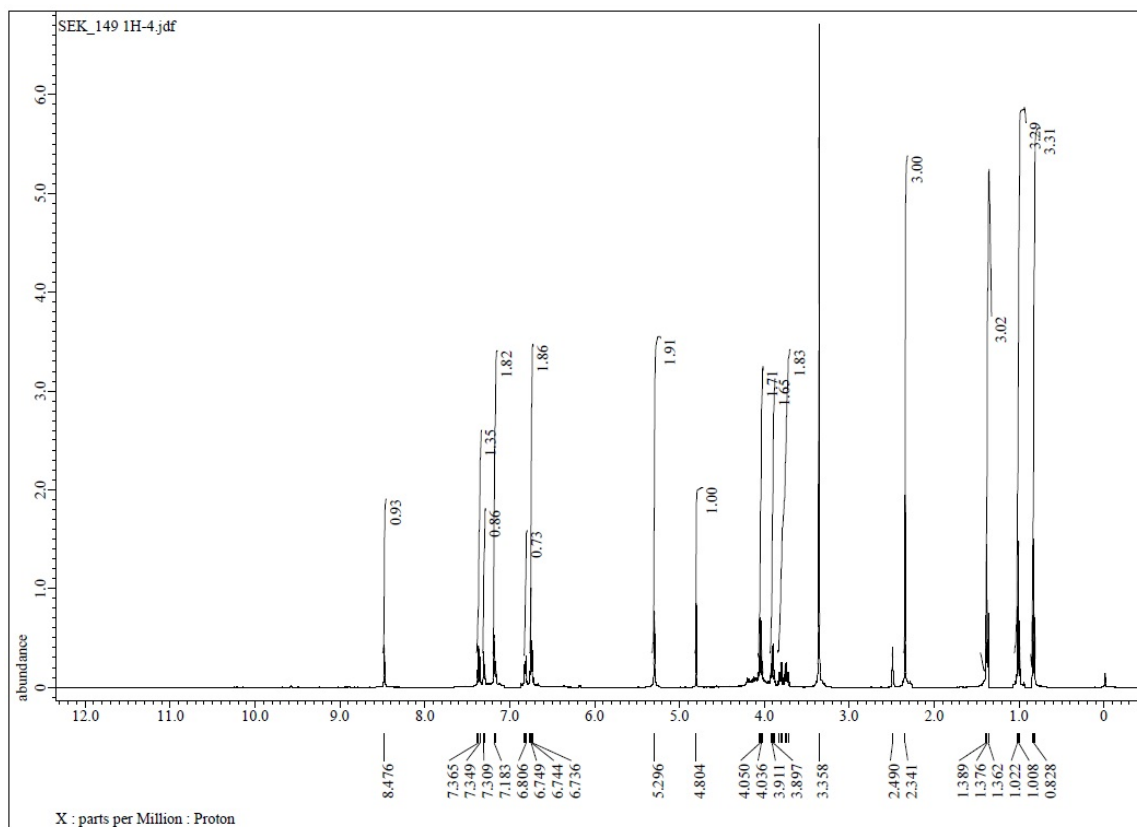

<sup>1</sup>H NMR spectrum of compound **5I**

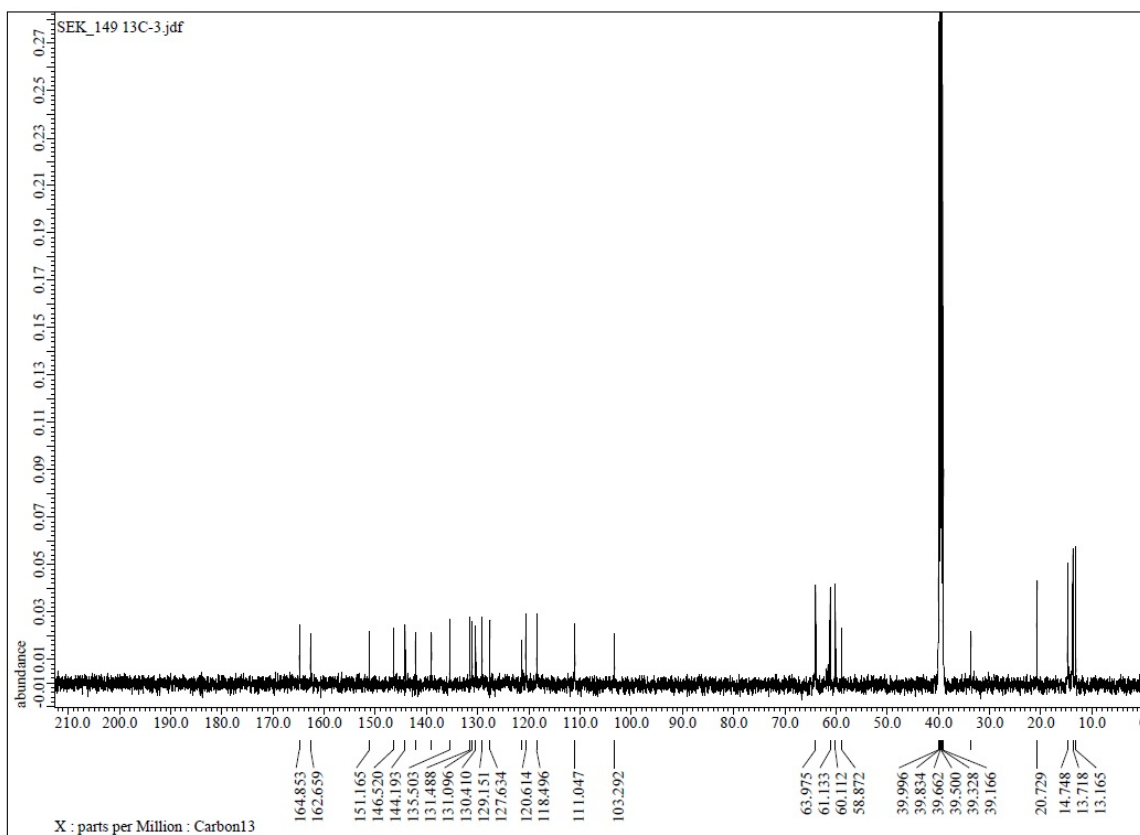

<sup>13</sup>C NMR spectrum of compound **5I**

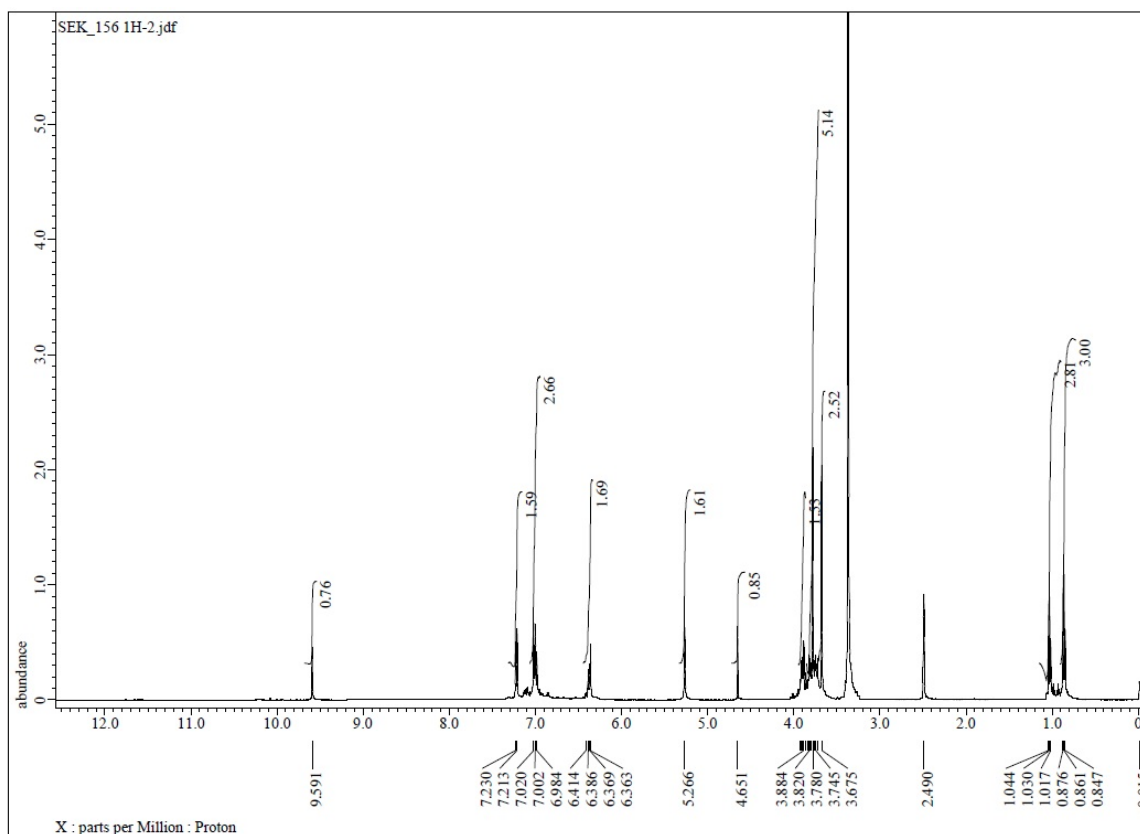

<sup>1</sup>H NMR spectrum of compound **5m**

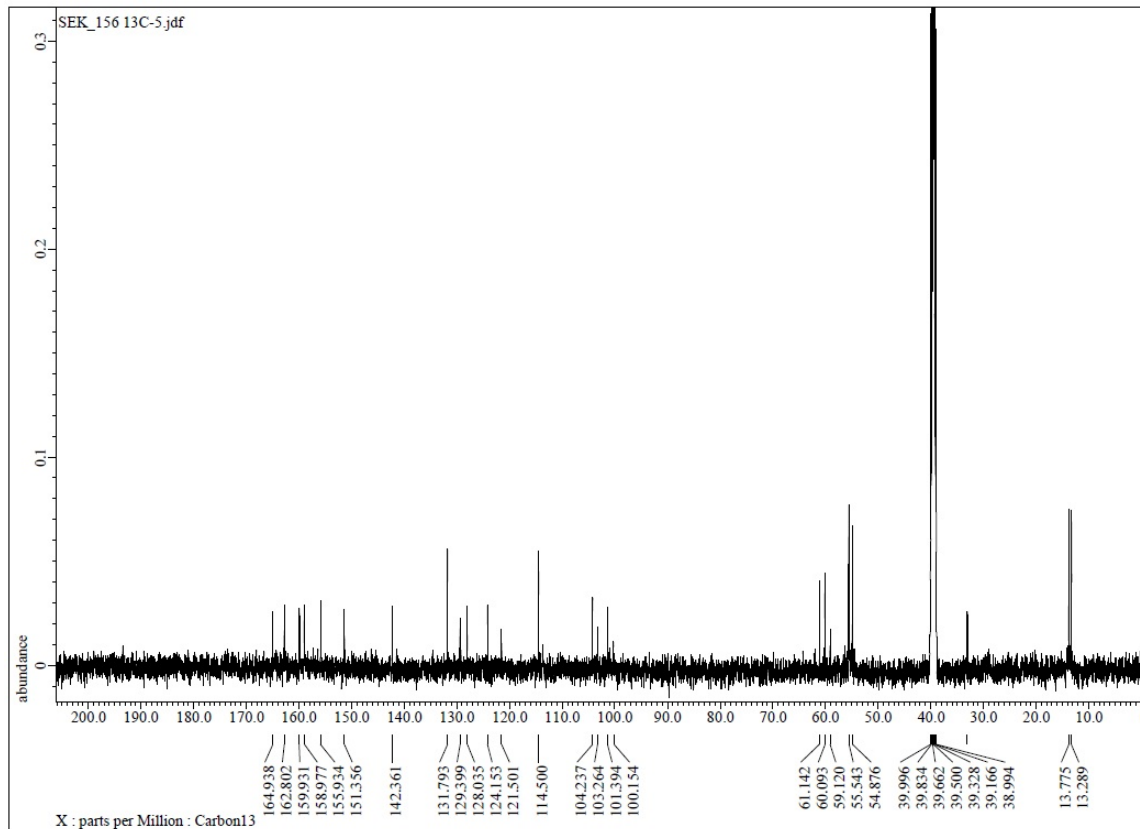

<sup>13</sup>C NMR spectrum of compound **5m**

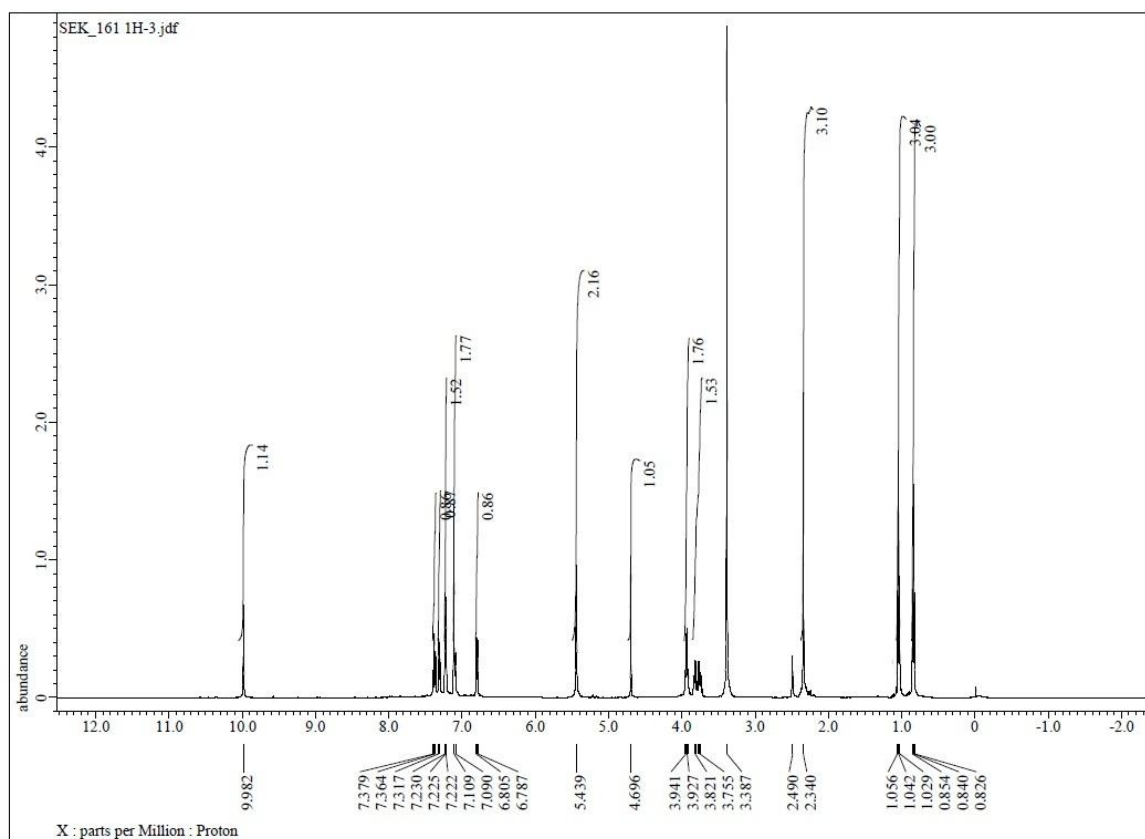

<sup>1</sup>H NMR spectrum of compound **5n**

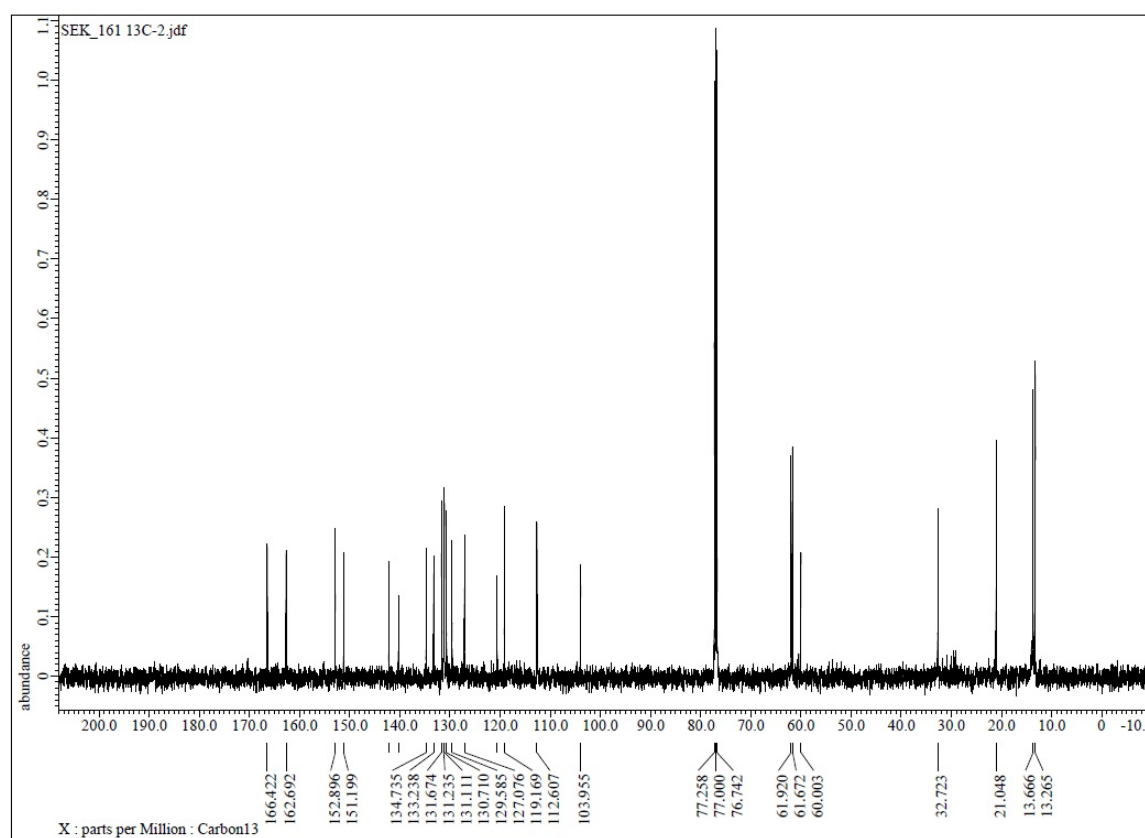

<sup>13</sup>C NMR spectrum of compound **5n**

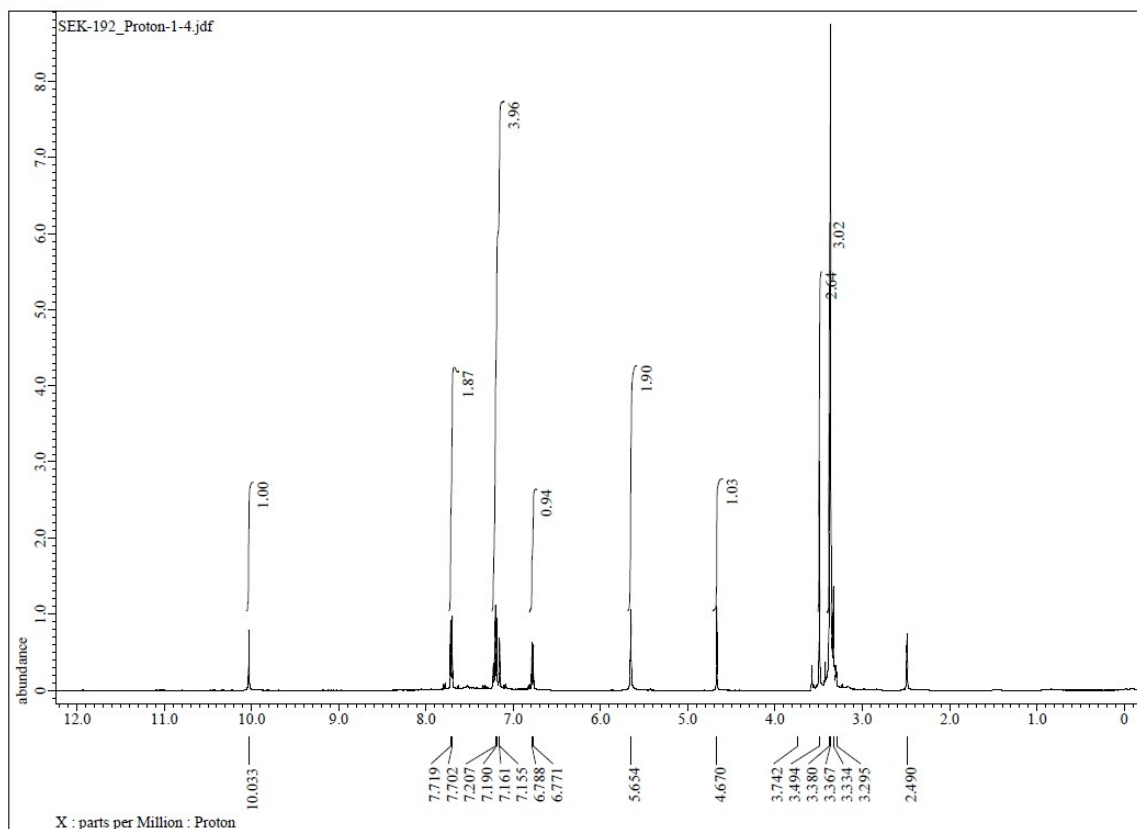

$^1\text{H}$  NMR spectrum of compound **5o**

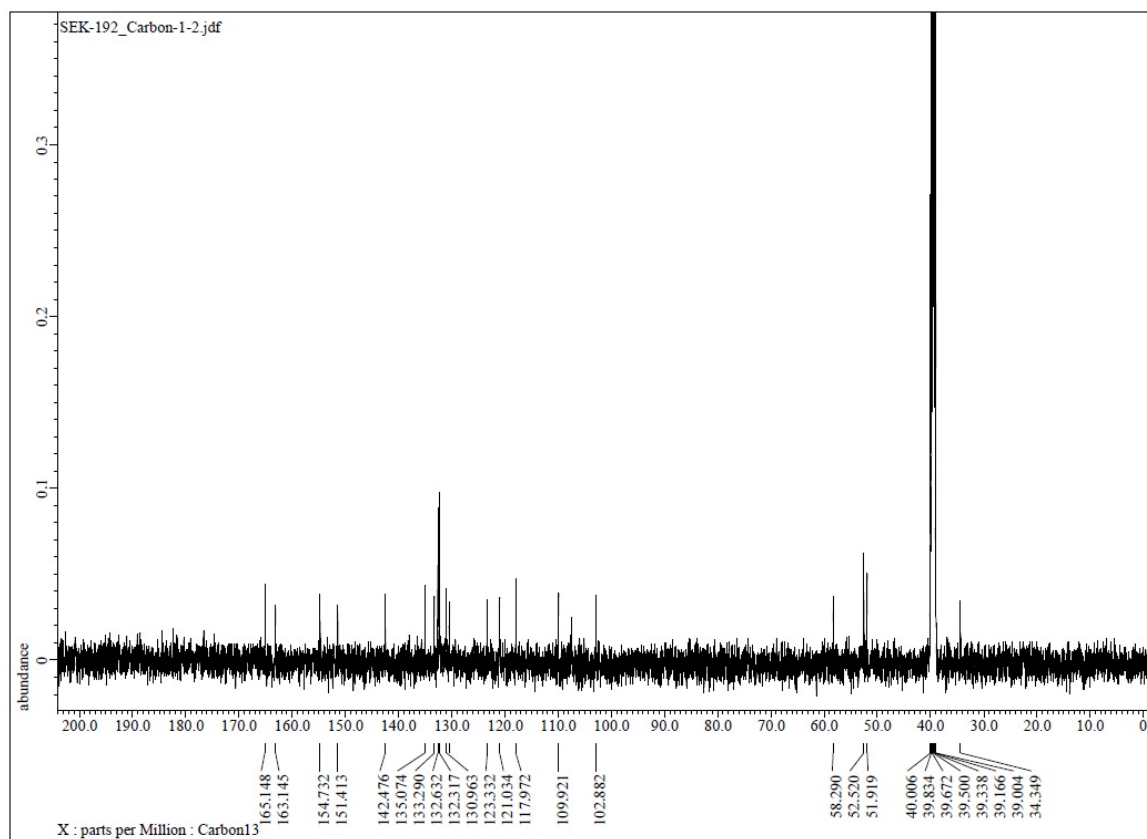

$^{13}\text{C}$  NMR spectrum of compound **5o**



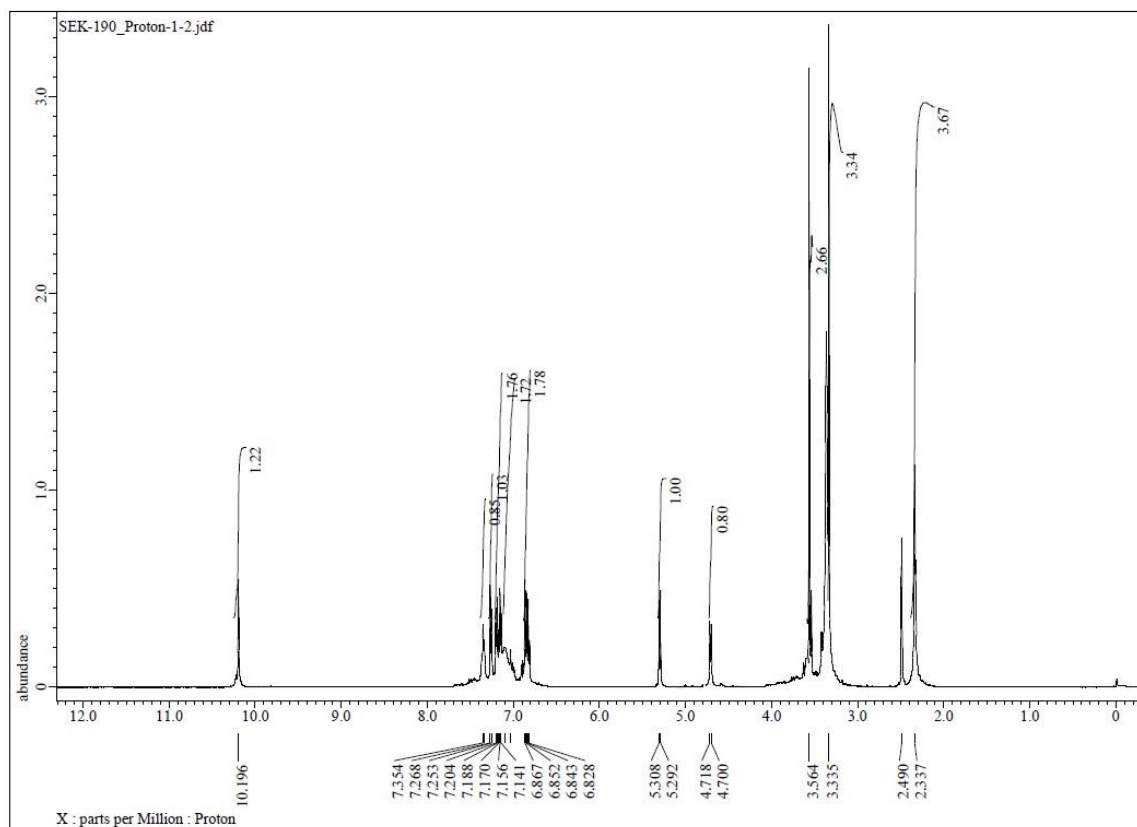

$^1\text{H}$  NMR spectrum of compound 13a

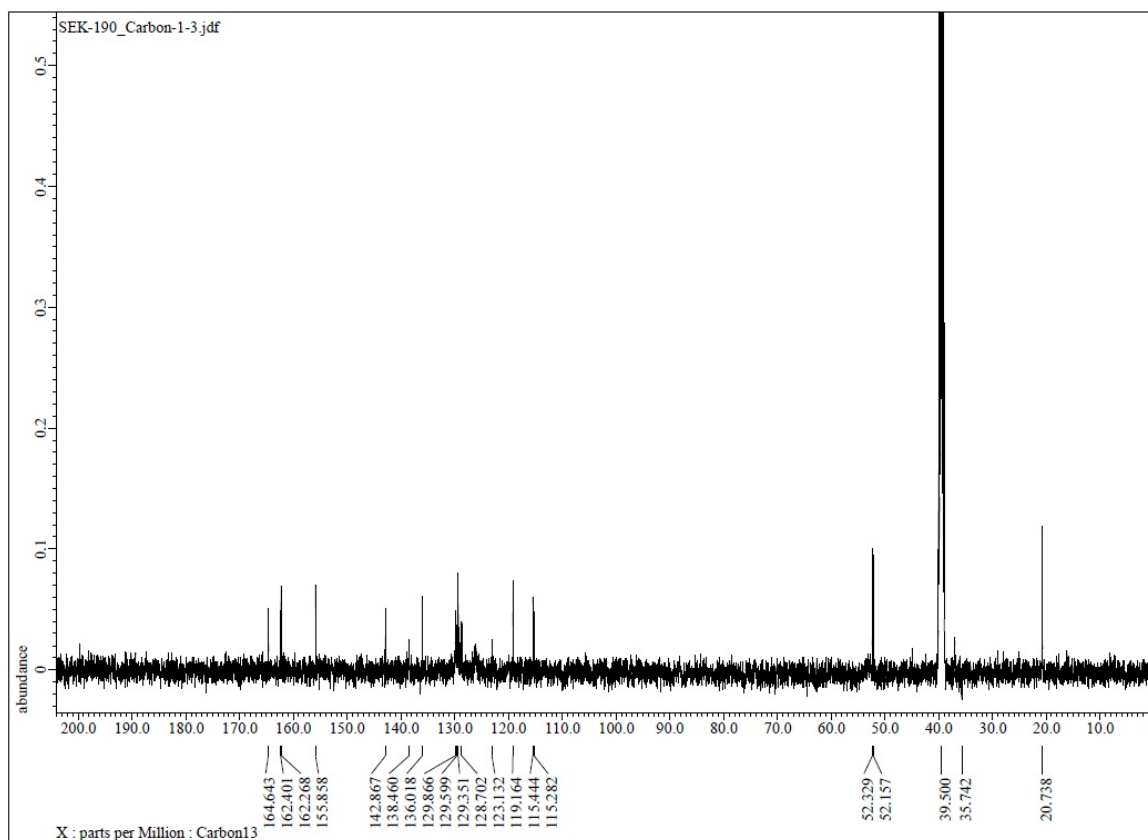

$^{13}\text{C}$  NMR spectrum of compound 13a

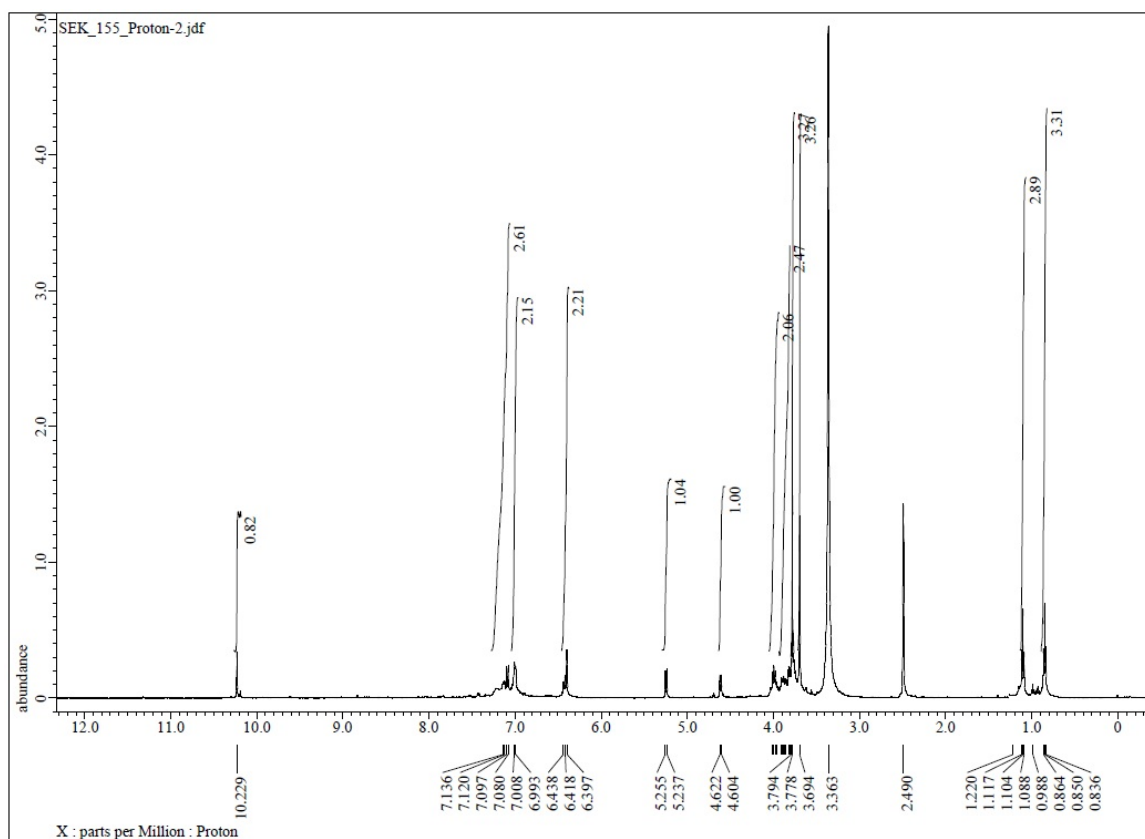

$^1\text{H}$  NMR spectrum of compound **13b**

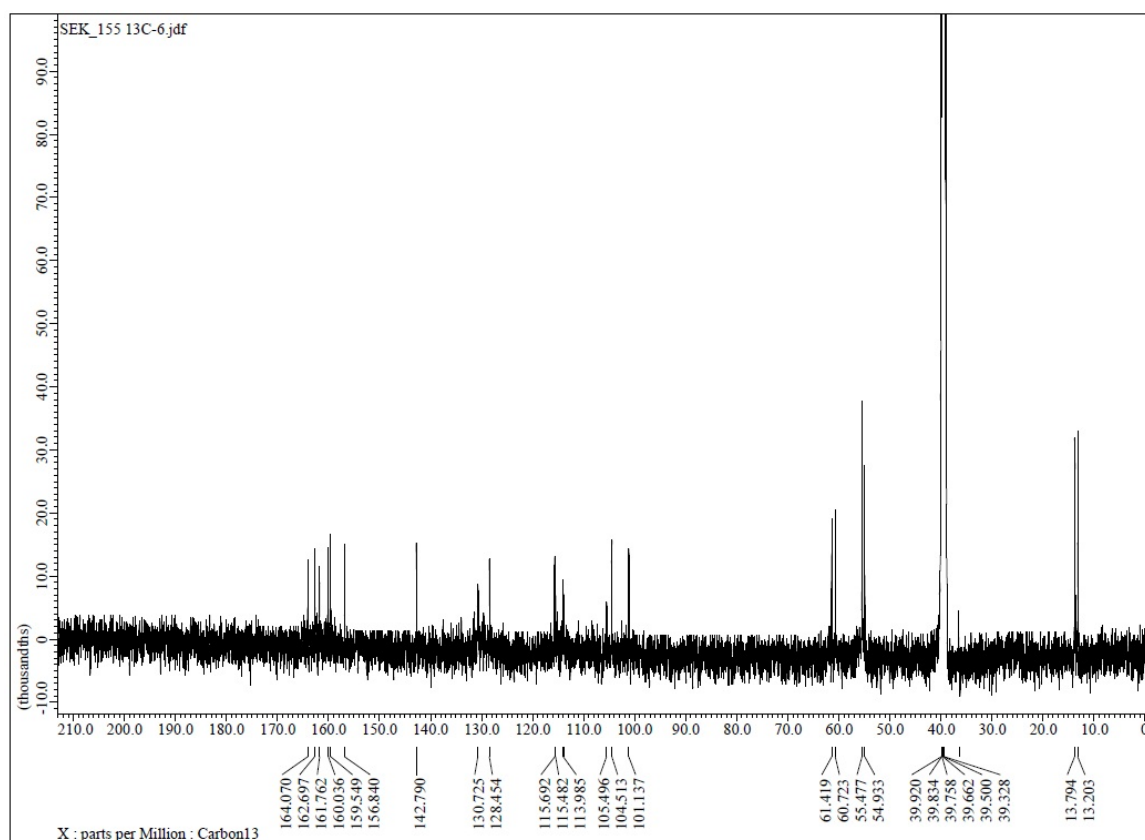

$^{13}\text{C}$  NMR spectrum of compound **13b**

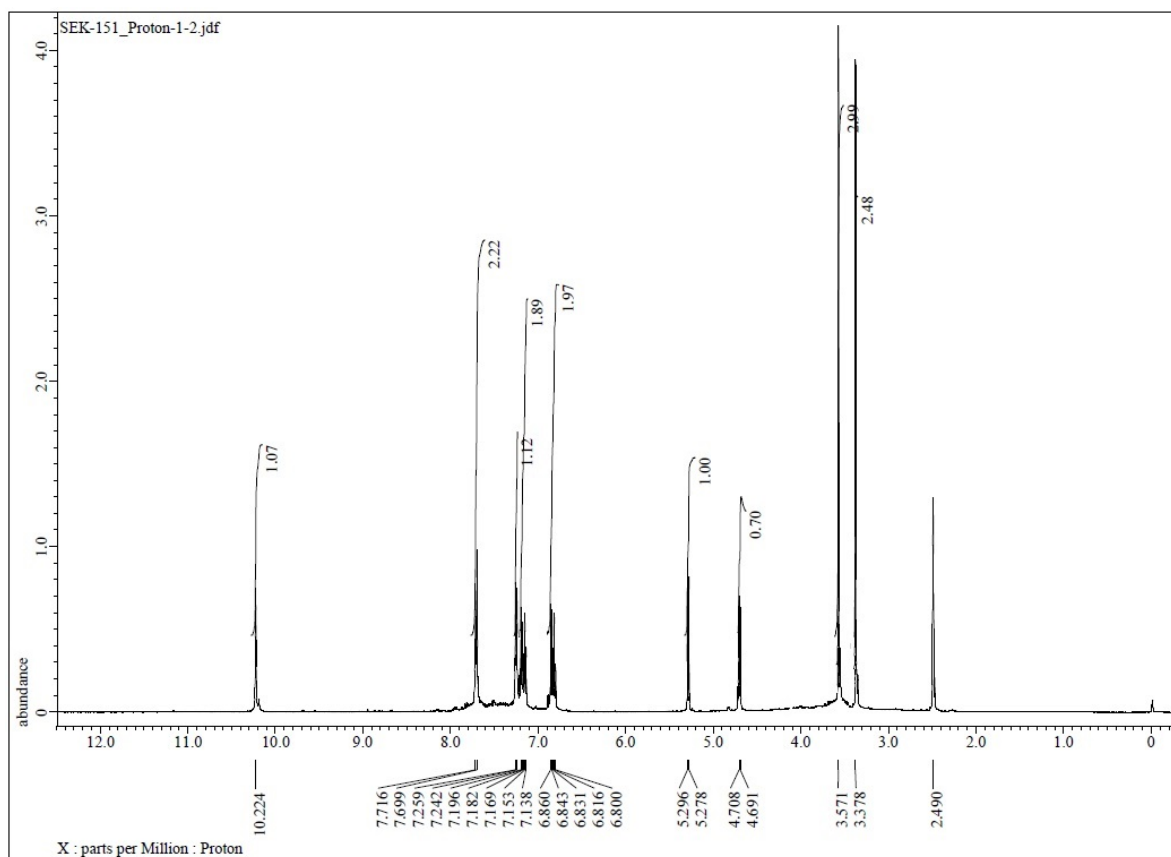

<sup>1</sup>H NMR spectrum of compound **13c**

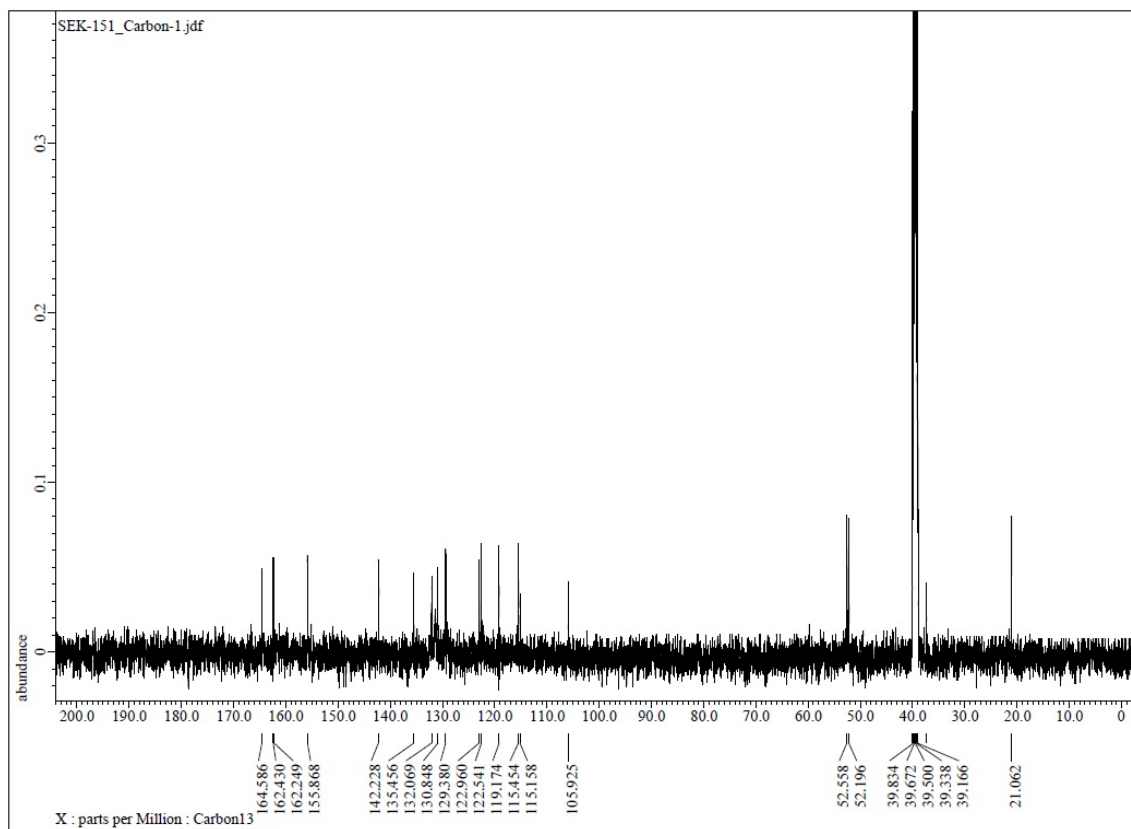

<sup>13</sup>C NMR spectrum of compound **13c**

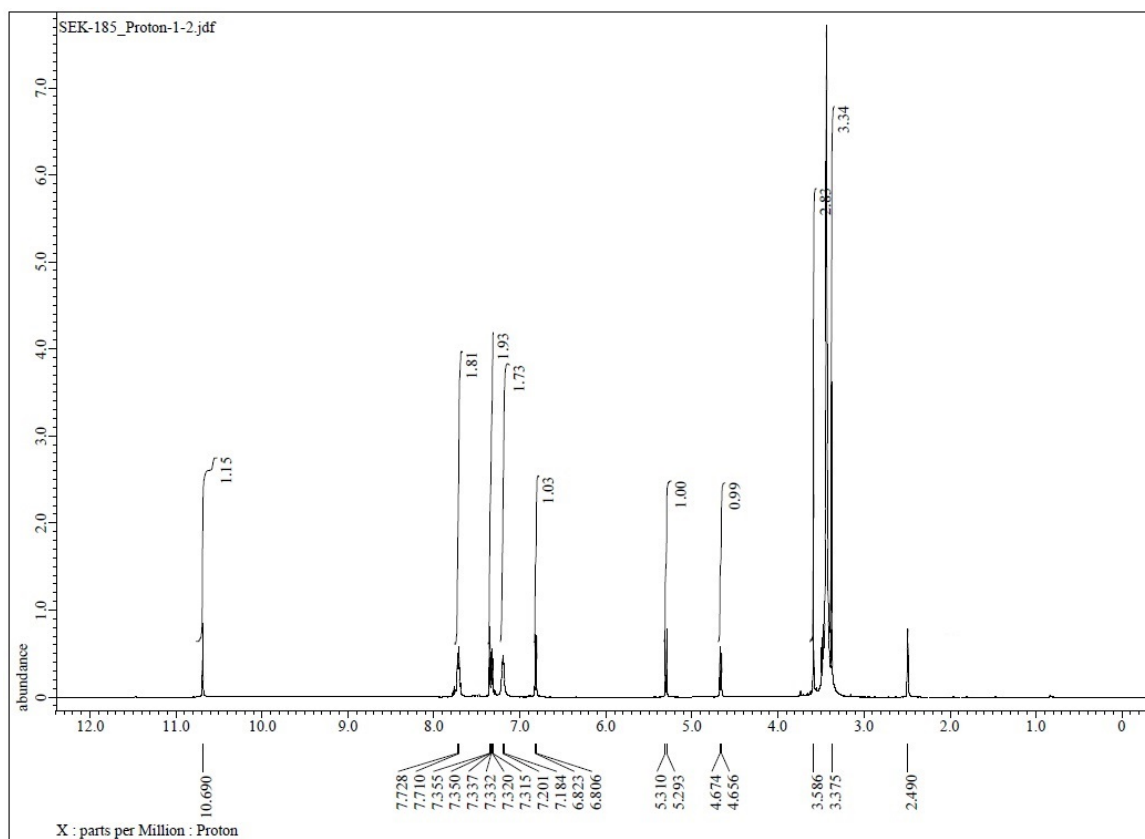

<sup>1</sup>H NMR spectrum of compound **13d**

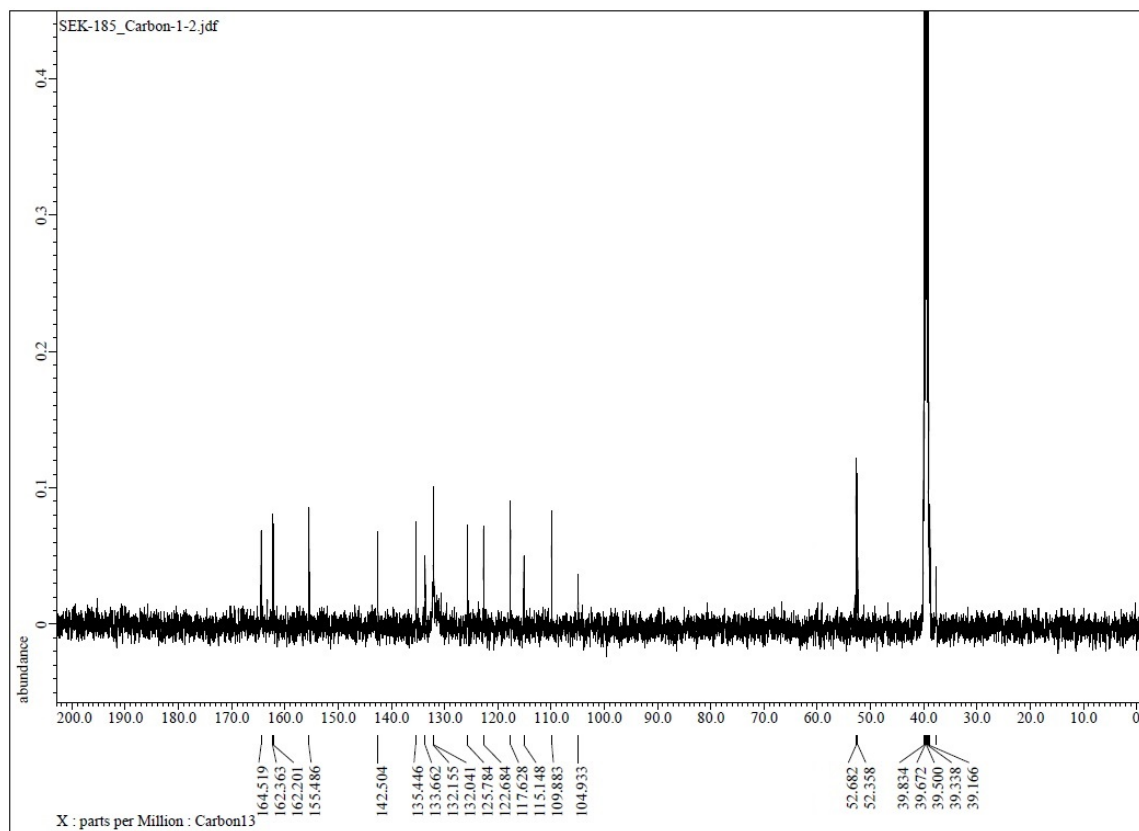

<sup>13</sup>C NMR spectrum of compound **13d**

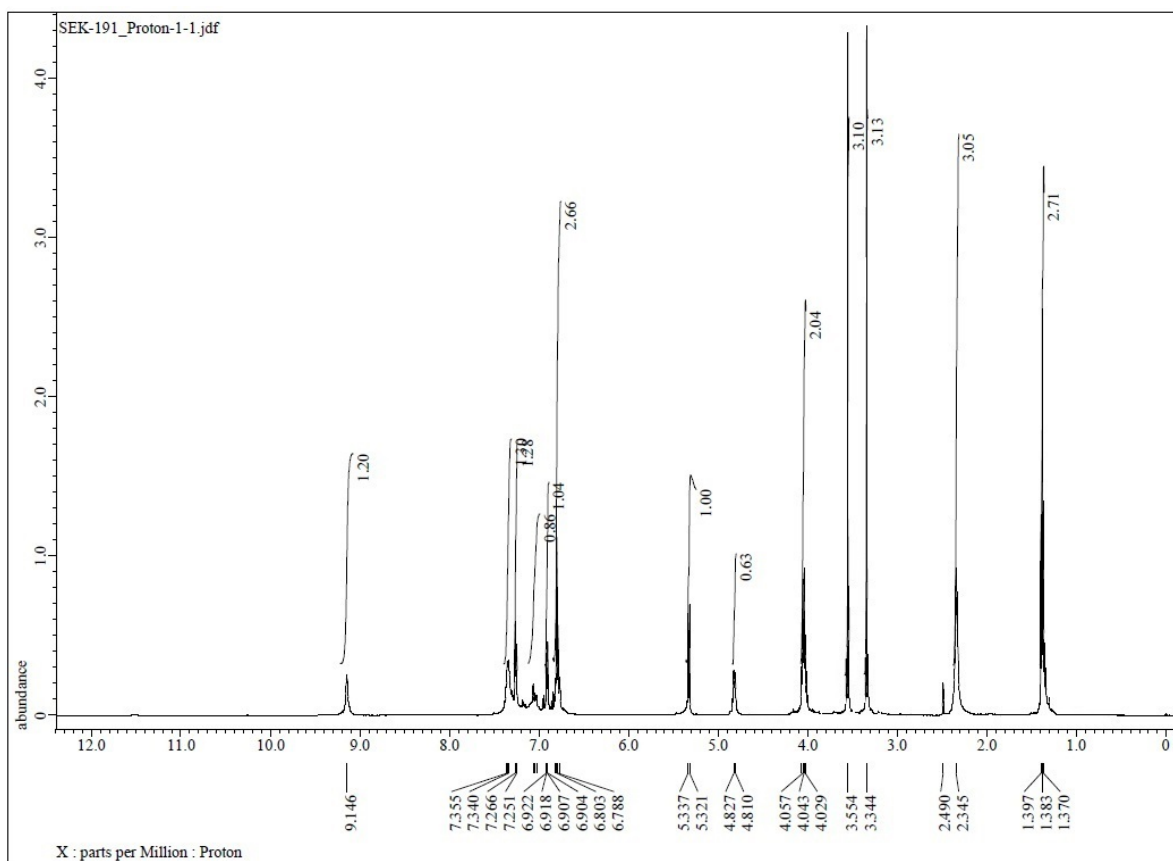

<sup>1</sup>H NMR spectrum of compound **13e**

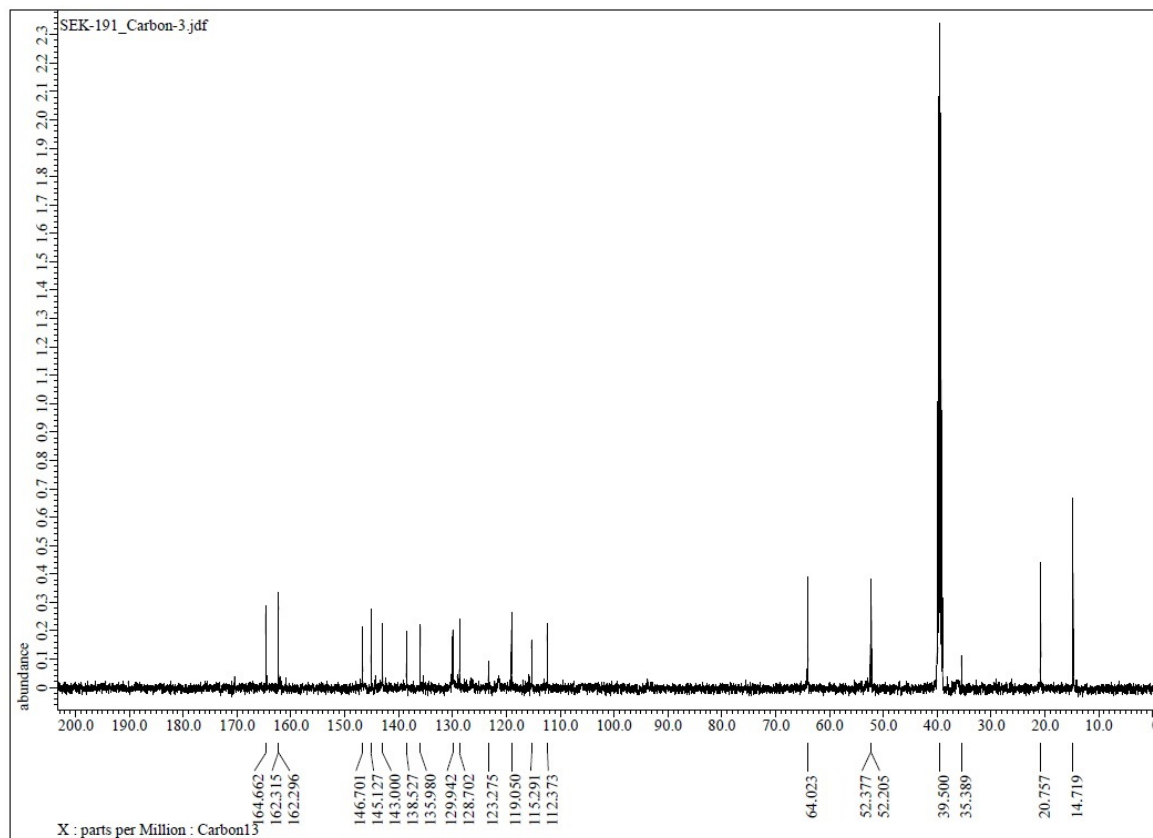

<sup>13</sup>C NMR spectrum of compound **13e**

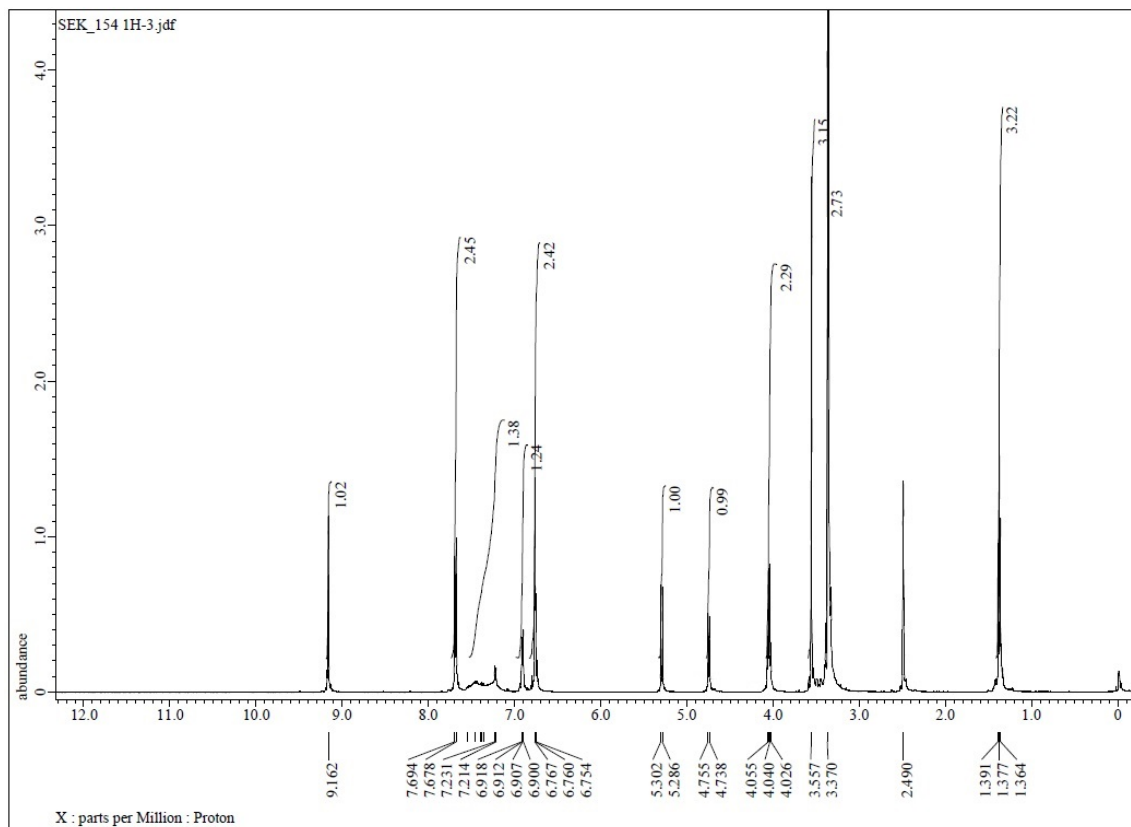

<sup>1</sup>H NMR spectrum of compound **13f**

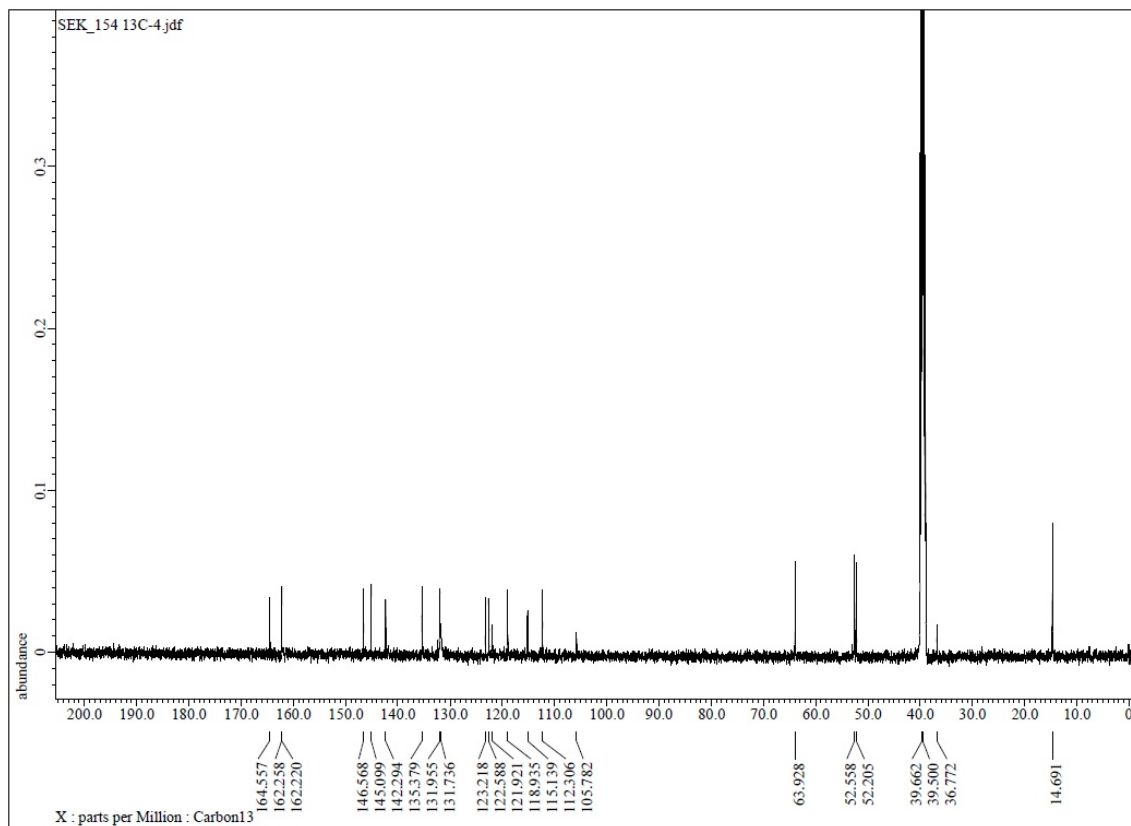

<sup>13</sup>C NMR spectrum of compound **13f**

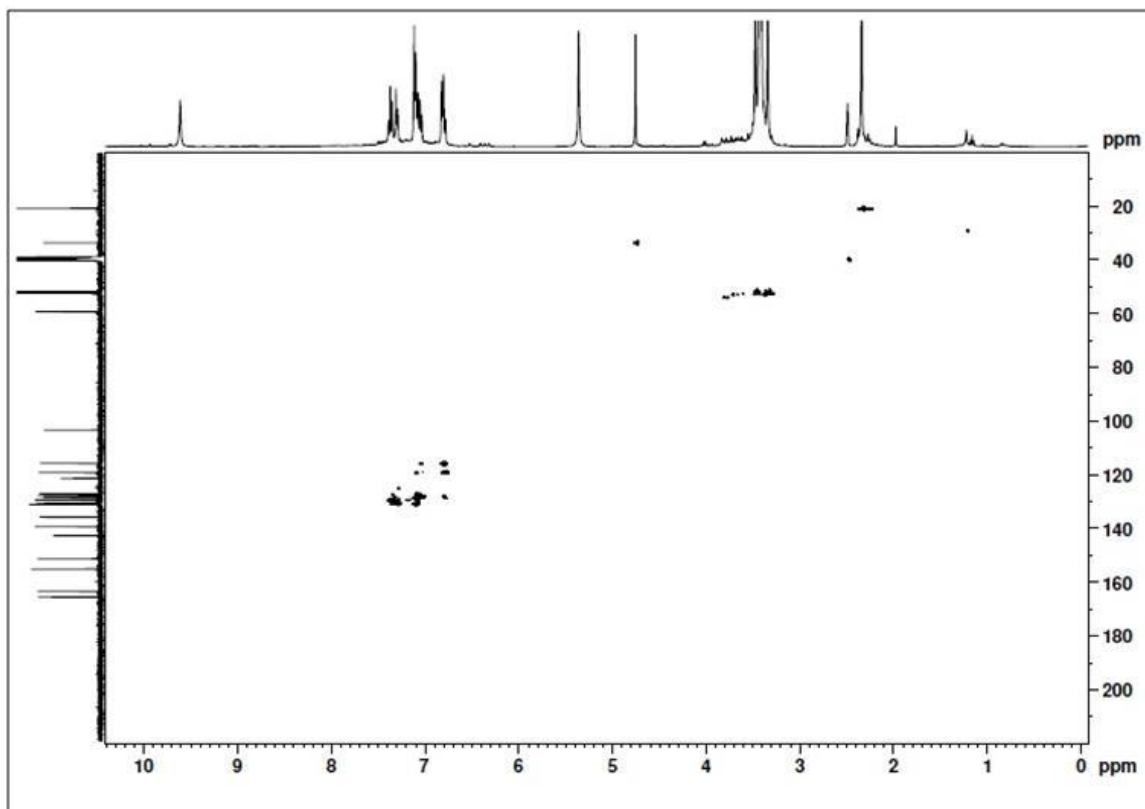

HSQC spectrum of **5a**

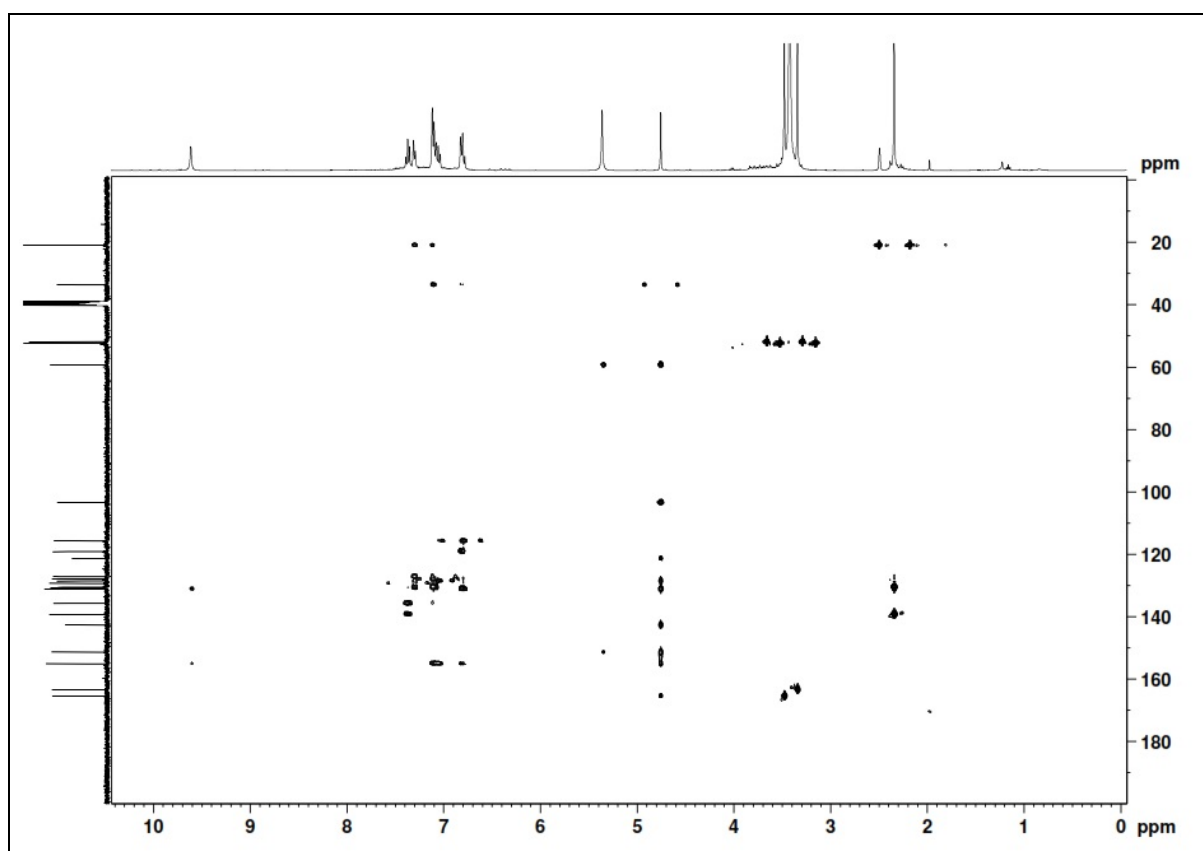

HMBC spectrum of **5a**

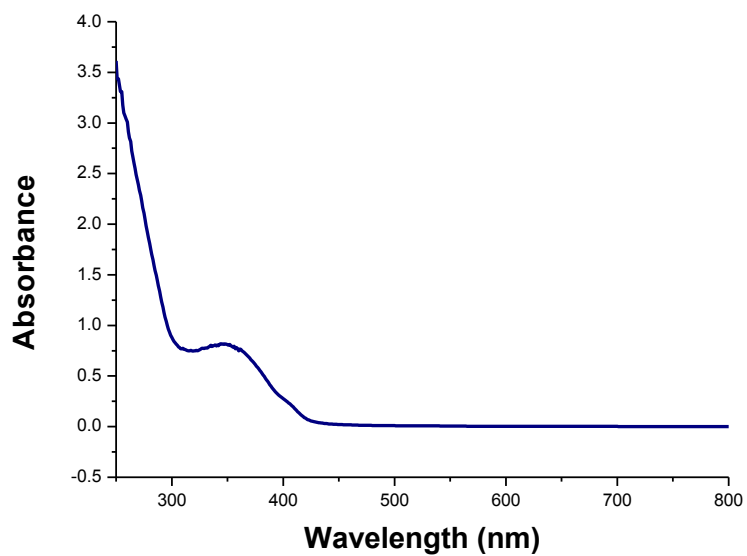

UV absorption spectrum of compound **5a**

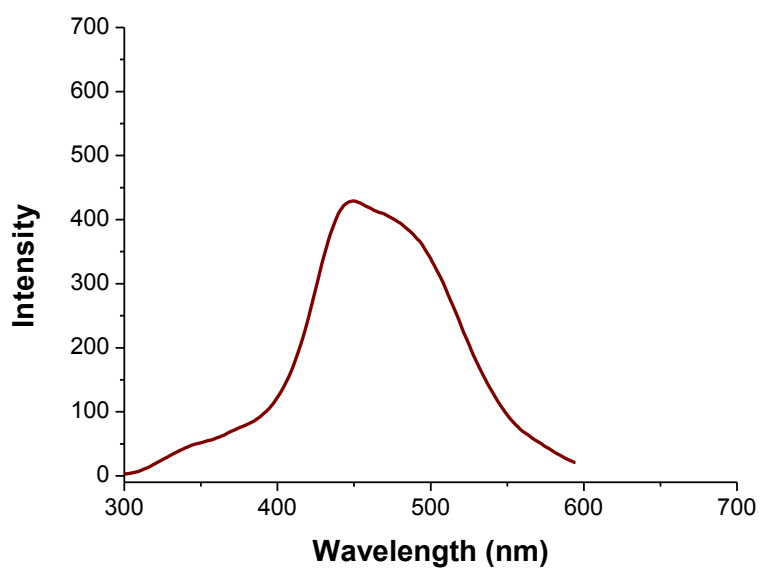

Emission spectrum of Compound **5a**



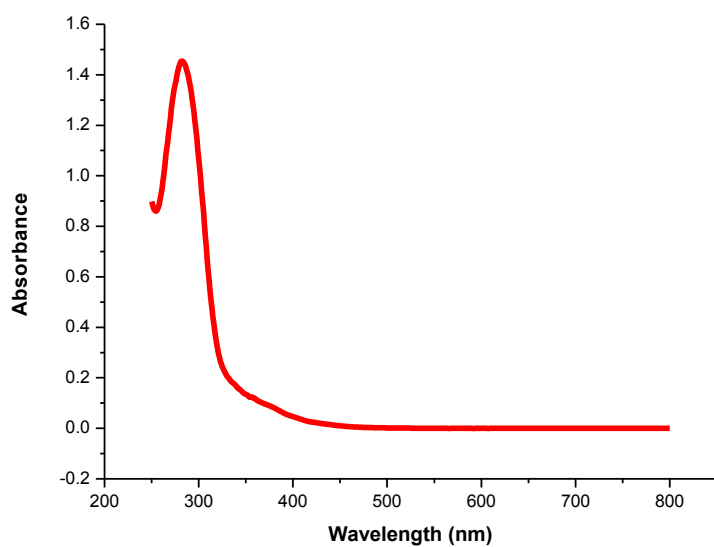

UV absorption spectrum of Compound **13a**

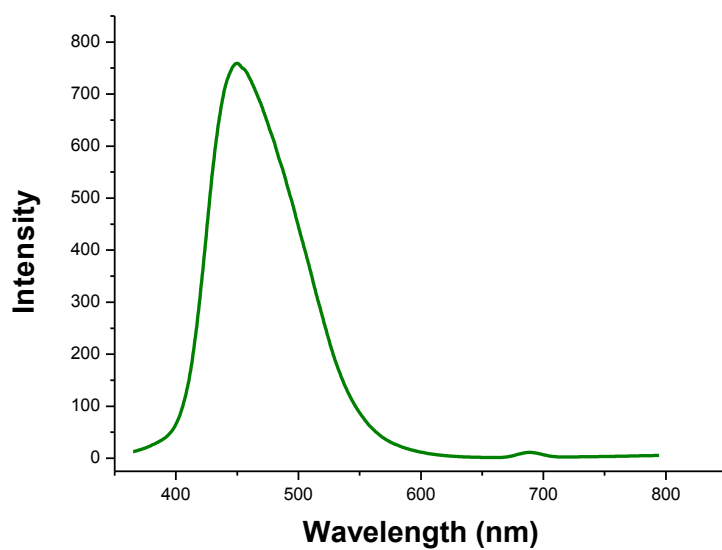

Emission Spectrum of Compound **13a**

### Correlation shown for H4 proton appearing at $\delta$ 4.75

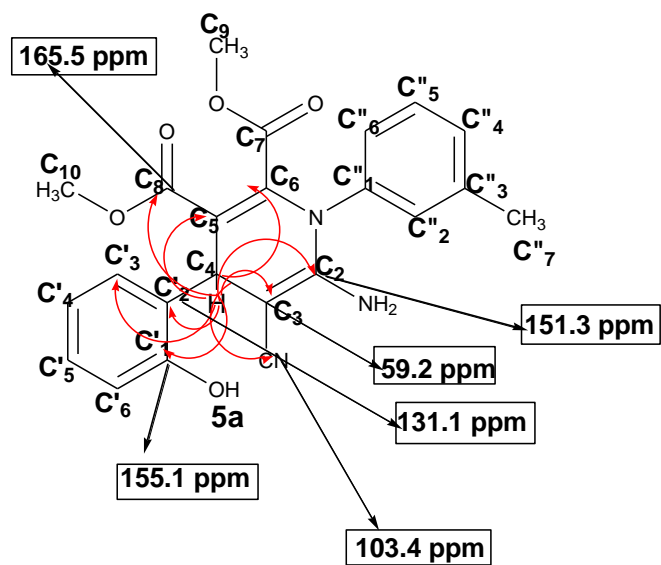

### Correlation shown for proton appearing at $\delta$ 9.61

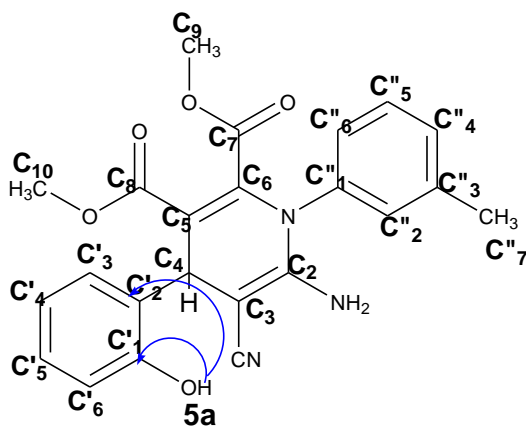

Supplement: c3ra45850d.pdf [file c3ra45850d.pdf]
